# Supplementary material for: The French reporting system for drug shortages: description and trends from 2012 to 2018: an observational retrospective study
Source: PubMed Central journal article supplement — BMJ Open. 2020 Mar 4;10(3):e034033. doi: 10.1136/bmjopen-2019-034033 (PMC7059530; doi:10.1136/bmjopen-2019-034033), 2020-03-04
Supplement: bmjopen-2019-034033.draft_revisions.pdf [file bmjopen-2019-034033.draft_revisions.pdf]

# BMJ Open

BMJ Open is committed to open peer review. As part of this commitment we make the peer review history of every article we publish publicly available.

When an article is published we post the peer reviewers' comments and the authors' responses online. We also post the versions of the paper that were used during peer review. These are the versions that the peer review comments apply to.

The versions of the paper that follow are the versions that were submitted during the peer review process. They are not the versions of record or the final published versions. They should not be cited or distributed as the published version of this manuscript.

BMJ Open is an open access journal and the full, final, typeset and author-corrected version of record of the manuscript is available on our site with no access controls, subscription charges or pay-per-view fees (<http://bmjopen.bmj.com>).

If you have any questions on BMJ Open's open peer review process please email [info.bmjopen@bmj.com](mailto:info.bmjopen@bmj.com)

# BMJ Open

## The French reporting system for drug shortages: description and trends from 2012 to 2018

|                               |                                                                                                                                                                                                                                                                                                         |
|-------------------------------|---------------------------------------------------------------------------------------------------------------------------------------------------------------------------------------------------------------------------------------------------------------------------------------------------------|
| Journal:                      | <i>BMJ Open</i>                                                                                                                                                                                                                                                                                         |
| Manuscript ID                 | bmjopen-2019-034033                                                                                                                                                                                                                                                                                     |
| Article Type:                 | Original research                                                                                                                                                                                                                                                                                       |
| Date Submitted by the Author: | 07-Sep-2019                                                                                                                                                                                                                                                                                             |
| Complete List of Authors:     | Benhabib, Amine; French Health Products Safety Agency; University of Strasbourg Faculty of Pharmacy<br>Ioughlissen, Saïd; French Health Products Safety Agency<br>Ratignier-Carbonneil, Christelle; French Health Products Safety Agency<br>MAISON, Patrick; French Health Products Safety Agency; CHIC |
| Keywords:                     | Drug shortages, supply of medicines, short supply, major therapeutic interest, pharmacosurveillance, France                                                                                                                                                                                             |
|                               |                                                                                                                                                                                                                                                                                                         |

SCHOLARONE™  
Manuscripts

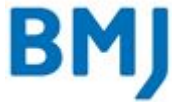

I, the Submitting Author has the right to grant and does grant on behalf of all authors of the Work (as defined in the below author licence), an exclusive licence and/or a non-exclusive licence for contributions from authors who are: i) UK Crown employees; ii) where BMJ has agreed a CC-BY licence shall apply, and/or iii) in accordance with the terms applicable for US Federal Government officers or employees acting as part of their official duties; on a worldwide, perpetual, irrevocable, royalty-free basis to BMJ Publishing Group Ltd ("BMJ") its licensees and where the relevant Journal is co-owned by BMJ to the co-owners of the Journal, to publish the Work in this journal and any other BMJ products and to exploit all rights, as set out in our [licence](#).

The Submitting Author accepts and understands that any supply made under these terms is made by BMJ to the Submitting Author unless you are acting as an employee on behalf of your employer or a postgraduate student of an affiliated institution which is paying any applicable article publishing charge ("APC") for Open Access articles. Where the Submitting Author wishes to make the Work available on an Open Access basis (and intends to pay the relevant APC), the terms of reuse of such Open Access shall be governed by a Creative Commons licence – details of these licences and which [Creative Commons](#) licence will apply to this Work are set out in our licence referred to above.

Other than as permitted in any relevant BMJ Author's Self Archiving Policies, I confirm this Work has not been accepted for publication elsewhere, is not being considered for publication elsewhere and does not duplicate material already published. I confirm all authors consent to publication of this Work and authorise the granting of this licence.

## The French reporting system for drug shortages: description and trends from 2012 to 2018

Amine Benhabib,<sup>1,2</sup> Said loughlissen,<sup>1</sup> Christelle Ratignier-Carbonneil,<sup>1</sup> Patrick Maison<sup>1,3</sup>

<sup>1</sup> French National Agency for Medicines and Health Products Safety (ANSM), Saint-Denis, France

<sup>2</sup> Strasbourg Faculty of Pharmacy, Illkirch-Graffenstaden, France

<sup>3</sup> EA 7379, Paris Est Creteil University (UPEC) and CHIC Hospital, Créteil, France

Correspondance to: Patrick Maison, Agence Nationale de Sécurité des Médicaments et des Produits de Santé, 143-147 bd, Anatole France, F-93285 Saint-Denis Cedex ; Tel +331 55 87 35 23 ; Fax +331 55 87 35 23 ; Email : patrick.maison@ansm.sante.fr

**Running head:** The French reporting system for drug shortages

**Keywords:** Drug shortages, supply of medicines, short supply, major therapeutic interest, pharmacosurveillance, France, national reporting system

**Word count:** *(excluding the abstract, references, tables, boxes, or figures): 2699*

**Numbers of tables and figures:** 5

## ABSTRACT

### Objectives

The aim was to provide figures for drug shortages in France and describe their characteristics, causes, and trends between 2012 and 2018.

### Methods

Data from the national reporting system from the Agency of Medicine and Health Product Safety (ANSM) was analyzed. This database contains information regarding effective and predicted shortages of major therapeutic of interest (MTI) drugs (*i.e.* drugs whose shortage would be life-threatening or representing a loss of treatment opportunity for patients with a severe disease) which are mandatory reported by marketing authorization holders to the ANSM. Data are presented as numbers or percentages of pharmaceutical products (*i.e.* the product name and its formulation) reported on shortage between 2012 and 2018.

### Results

There were 3530 pharmaceutical products reported on shortage during the period, including 1833 different active substances. Drugs on shortage were mostly former products (63.4%) with national marketing authorization procedures (62.8%), as well as injectable and oral forms (47.5% and 43.3%, respectively). Antiinfectives for systemic use ranked first (18%), followed by nervous and cardiovascular system drugs and by antineoplastic and immunomodulating agents (respectively 17.4%, 12.5% and 10.4%). The number of reported shortages presented a 4-fold increase between 2012 and 2018 and a sharp rise in 2017&2018, along with a rise in the number of active substances on shortage. The therapeutic classes concerned remained similar over time. Manufacturing and material supply issues were the main reported reasons for the shortage each year (30%) and there was an overall rise of pharmaceutical market reasons.

### Conclusion

Drug shortages were increasingly reported in France along with a reinforced regulation. Preventive measures should specifically target the products the most on shortage, in particular former drugs, injectable, antiinfective, nervous system and cardiovascular system drugs as well as antineoplastic and immunomodulating agents.

## INTRODUCTION

Drug shortages are a major public health threat worldwide occurring in all therapeutic classes.<sup>1-7</sup> According to the WHO, a drug shortage is defined as an insufficiency in the supply of medicines, health products and vaccines that are identified by the health system as essential to meet public health and patient need.<sup>8</sup> Drug shortages can have detrimental effects on patients care as they may result in delayed treatment or switches into alternative therapies, therefore leading to disease progression, increased risk of adverse effects or medication errors as well as rising healthcare costs.<sup>9-11</sup> Multiple reasons, such as manufacturing issues, regulatory issues or economic factors, in addition to increased global demand have been suggested to underlie drug shortages.<sup>1 3 12 13</sup>

In France, the management of drug shortages and short supply was first regulated in 2012 with a decree dated September 28<sup>th</sup>, 2012 on the supply of human drugs.<sup>14</sup> This decree requires the pharmaceutical operators commercializing drugs in France to ensure an appropriate and continuous supply of wholesalers and hospitals within 72 hours. Marketing authorization holders were thus mandated to notify the French National Agency of Medicine and Health Product Safety (*Agence Nationale de Sécurité du Médicament et des produits de santé* – ANSM) of any effective or predicted drug shortage, specifying the available stocks, the estimated period of shortage, the deadline for the availability of the product, as well as the substitute drugs. In 2016, the French health law of January 26<sup>th</sup> and its decree of July 20<sup>th</sup> targeted the shortages of drugs of major therapeutic of interest (MTI), defined as drugs for which unavailability would be life-threatening or representing a loss of treatment opportunity.<sup>15</sup> This decree also warrants new regulatory tools in order to reinforce the legal obligations of pharmaceutical companies and wholesalers. Marketing authorization holders and operators were required to develop shortage management plans (*Plan de Gestion des Pénuries* – PGP), and wholesalers were not allowed to export MTI drugs that are on effective or predicted shortage. Responsibilities of pharmaceutical operators were also strengthened by the implementation of administrative or financial penalties in case of non-compliance.<sup>15 16</sup>

According to a survey conducted in 2014, drug shortages were increasingly reported in Europe and occurred daily or weekly.<sup>3</sup> While the issue of drug shortages has been widely studied in the USA,<sup>17-20</sup> figures in Europe are scarce and national trends of drug shortages are not available.<sup>26</sup> The identification and surveillance of the most frequent drugs on shortage and the analysis of their causes may allow implementing targeted preventive measures in order to limit the negative impacts on patient care. The present study therefore aimed to describe the characteristics and trends of

1  
2  
3 reported shortages of MTI drugs in France using the national reporting system from the Agency of  
4 Medicine and Health Product Safety (ANSM).  
5  
6  
7  
8  
9

## 10 **METHODS**

11  
12  
13  
14

15 This observational retrospective study analyzed the surveillance reporting system of drug shortages  
16 from the French National Agency of Medicine and Health Product Safety (ANSM) between 2012 and  
17 2018. Since 2012, marketing authorization holders are indeed obliged to declare any effective or  
18 predicted shortage of MTI drugs to the ANSM. The reporting database contains the information  
19 reported by the marketing authorization holders via completed declaration forms. The following data  
20 were analyzed: (1) from declaration forms: dates of report, drugs names, active substances  
21 (International Nonproprietary Names (INN)), routes of administration, setting first impacted by the  
22 shortage (community pharmacy and/or hospital), reasons for the shortages (available since 2015); (2)  
23 from the marketing authorization dossier and the summary of the product characteristics: dates and  
24 procedures of marketing authorization grants, storage conditions; and (3) ATC codes according to the  
25 WHO Collaborating Centre for Drug Statistics Methodology.<sup>21</sup>  
26  
27  
28  
29  
30  
31  
32  
33

34 Drug shortage reports were defined as both effective and predicted shortages of MTI drugs recorded  
35 by the ANSM each year.  
36  
37

38 Duration of the marketing authorization grant was defined as the difference between the years of  
39 the shortage reports and the year when the marketing authorization was granted.  
40  
41

42 Causes of shortages were categorized into: (1) manufacturing issues, including the stage of  
43 manufacturing or packaging of the final product ; (2) material issues, *i.e.*, defect in raw materials,  
44 excipients, packaging and semi-finished or bulk pharmaceuticals ; (3) pharmaceutical market, *i.e.*,  
45 related to the difficulty of the operator to purchase products, including insufficient production  
46 capacity ; (4) regulatory issues, *i.e.*, new regulation directly related to the delayed marketing ; and (5)  
47 inventory and storage practices, *i.e.*, stock errors or inappropriate management of expiry date.  
48  
49  
50  
51  
52

53 Data were presented in numbers or in percentages of pharmaceutical products reported on  
54 shortage. Pharmaceutical products were defined as a combination of the International  
55 Nonproprietary Name (INN), the formulation and the packaging and are identified by the *code*  
56 *identifiant de spécialité* (CIS).  
57  
58  
59  
60

## Patient and public involvement

No patient involved.

## RESULTS

Between the years 2012 and 2018, 3530 pharmaceutical products were reported of on shortage, including 1833 different International Nonproprietary Name (INN) drugs. The overall characteristics of the pharmaceutical products reported on shortage from 2012 to 2018 are presented in **table 1**. Drugs with a marketing authorization granted more than 10 years ago (63.4%) and according to a national procedure (62.8%) were the most concerned. Generics drugs accounted for 34% of shortages overall and for 17% of former drugs (marketing authorization grant > 10 years). Community pharmacies and hospitals were similarly first impacted by shortages. Injectable and oral were the most commonly affected forms (with respectively 47.5% and 43.3%). With regards to ATC classes, antiinfectives for systemic use ranked first with 18% of total shortage reports, followed by nervous and cardiovascular system drugs as well as by antineoplastic and immunomodulating agents (with respectively 17.4%, 12.5% and 10.4) (**table 1**). Antibacterial for systemic use and vaccines accounted for 53% and 19% of antiinfectives shortages, respectively. Antiepileptic, anesthetic and analgesic products were among the most common nervous system drugs on shortage (22%, 18% and 16%, respectively).

Trends in the number of pharmaceutical products and INN drugs reported on shortage were shown in **figure 1**. There was a 4-fold increase in the total products on shortage between 2012 and 2018, to reach 917 shortages in 2018. The numbers of INN on shortage were similar in 2013 and 2017 but presented a 2-fold increase between the years 2012 and 2018, to reach a peak in 2018 (n=399) (**figure 1**).

Injectable and oral forms remained the two main pharmaceutical forms on shortage each year (from 51% to 37% and 40% to 56% between 2012 and 2018 for injectable and oral forms, respectively).

All therapeutic classes were reported on shortage each year. **Figure 2** presents the trends in proportions of shortage of pharmaceutical products by ATC classes from 2012 to 2018. The distribution of ATC classes reported on shortage was similar over time. Antiinfectives for systemic use, nervous system drugs as well as antineoplastic and immunomodulating agents ranked among the first classes on shortage until 2017. Shortages of cardiovascular system drugs were increasingly reported since 2012 and a sharp rise occurred in 2018 (n=216 reports). Cardiovascular drugs ranked



1  
2  
3 first in 2018 (24%), explained by products of valsartan accounting for half of shortages. The  
4 proportion of nervous system drugs, antiinfectives and antineoplastic and immunomodulating agents  
5 on shortage was relatively stable over the years (**figure 2**). Yet, a continuous increase of shortages  
6 was observed for nervous system drugs that ranked second in 2018 (n=181 reports) (**figure 2**). In  
7 2018, antiepileptics accounted for the most reported class of nervous system drugs on shortage  
8 (34%), of which 13 were topiramate-based products. There was also a rise in shortages of  
9 antiinfective products in 2017 (n=122), driven in half by antibacterial drugs, in particular  
10 cephalosporins (n=23). Among antiinfectives, antibacterial drugs were the first class reported on  
11 shortage each year between 2012 and 2018, followed by vaccines (data not shown).  
12  
13  
14  
15  
16  
17  
18

19 **Figure 3** presents the trends in the proportion of shortage of pharmaceutical products by duration of  
20 marketing authorization grant from 2012 to 2018. During that period, drugs with a former marketing  
21 authorization grant (of more than 10 years) were the most reported on shortage.  
22  
23  
24

25 Drug shortages first impacting hospital settings accounted for half of the shortages in 2017 and for a  
26 third in other years. Similar trends in the proportion of shortage were observed for settings first  
27 impacted (data not shown).  
28  
29

30 Trends in the reported causes of shortages between 2015 and 2018 are shown in **figure 4**.  
31 Manufacturing and material supply issues were the main reasons each year with approximately 30%  
32 of the shortage share. There was an overall rise of pharmaceutical market reasons.  
33  
34  
35  
36  
37  
38  
39  
40  
41  
42  
43  
44  
45  
46  
47  
48  
49  
50  
51  
52  
53  
54  
55  
56  
57  
58  
59  
60

## DISCUSSION

Based on the French national reporting system, the present study described the characteristics of MTI drugs reported on shortage in France between 2012 and 2018 as mostly: former drugs, drugs with national marketing authorization procedures and injectables. Both hospital and community pharmacies were similarly affected by shortages and one third of them first occurred in hospital settings. Four therapeutic classes (antiinfectives, nervous system, cardiovascular system drugs, antineoplastics and immunomodulating agents) remained the most on shortage with the same distribution over the years. The number of pharmaceutical products reported on shortage increased by 4-fold between 2012 and 2018, along with a rise in the number of INN drugs. In 2018, the number of pharmaceutical products on shortage reached a peak, with 399 different active substances from all therapeutic classes affected by shortage. Compared with the number (n=2 800) of approved and marketed INN drugs in France in 2016,<sup>22</sup> there were approximately 13% of INN drugs on shortage in 2018 and 60% during the 2012-2018 period.

The present rise in drug shortages in France is consistent with overall trend observed in the USA, reflecting the international public health challenge of drug shortages. According to the University of Utah Drug Information Service (UUDIS), new drugs on shortage in the USA were found to triple between 2004 and 2018, although a decrease occurred since 2012.<sup>23</sup> Comparisons of figures between the two countries are yet limited by differences in definitions of drug shortage<sup>2</sup> as well as differences in pharmaceutical products, blister packaging being less used in the USA.

The four therapeutic classes most impacted by shortages in the present study were antiinfectives for systemic use, nervous system drugs, cardiovascular drugs and antineoplastic and immunomodulating agents, in accordance with previous results from a European review finding that these same four classes represented over 50% of reported shortage.<sup>4</sup> We found that antiinfectives for systemic use represented the first therapeutic class reported on shortage until 2018 (18%) among which antibacterial drugs ranked first each year. This trend is well documented across the United States. Antimicrobials were the most common drug class on shortage in critical care (2001-2016) and emergency medicine practice (2001-2014), representing respectively 20% and 24% of US shortages.<sup>18</sup> Cephalosporins were the most common antibacterial drug class reported on shortage in our study, in accordance with findings from a US study using the UUDIS database from 2001 to 2013.<sup>24</sup> Shortages of antimicrobials may not have alternative production sources and may thus require the use of less effective or more toxic alternatives,<sup>19 24</sup> leading to worse patient outcomes.<sup>17</sup> In a European survey, antiinfectives were also found to be the most common drugs on shortage in

1  
2  
3 hospital pharmacies in 2013, along with cancer drugs.<sup>25</sup> The burden of cancer drug shortages was  
4 previously highlighted in the United States<sup>26 27</sup> and more recently in a hospital paediatric hemato-  
5 oncology unit in Belgium.<sup>7</sup> A lack of market attractiveness and low profitability has been suggested as  
6 a cause of shortages, due to prompting the discontinuation of some long-standing or lower-priced  
7 products such as antibiotics and oncologic medicines.<sup>1</sup>  
8  
9

10  
11  
12 In the present study, cardiovascular drugs were one of the first therapeutic classes on shortage and  
13 the first in 2018 (28%). This was driven by shortages of valsartan products resulting from the  
14 detection in 2018 of impurities in the active substance of valsartan-based medicines. As a precaution,  
15 all potentially impacted batches of valsartan containing drugs were recalled in France since July  
16 2018.<sup>28</sup> Shortage of cardiovascular drugs was also common in the USA.<sup>19, 29</sup>  
17  
18  
19

20  
21 In this study, shortages mostly involved injectable products each year. This finding is consistent with  
22 previous surveys in Europe and USA.<sup>4, 19</sup> Injectable products are at increased risk of shortage related  
23 to quality control concerns because of the complexities associated with manufacturing a sterile  
24 product.<sup>2</sup> Oral drugs also accounted for a large share of shortages in our study, reflecting that causes  
25 of drug shortages goes beyond pure manufacturing problems related to technical issues or quality  
26 problems.  
27  
28  
29  
30

31  
32 According to our results, former drugs were the most reported on shortage during the period from  
33 year 2012 to year 2018, with 63.4% of drug shortages while there were 45% of former products on  
34 the market in 2018 in France. Age of the marketing authorization is thus likely to be a major  
35 determinant of drug shortage, in accordance with a US study finding that the age of drug was a  
36 strong risk factor for shortage in oncology.<sup>26</sup> According to the authors, this result suggested that  
37 policies focused predominately on promoting increases in distinct suppliers and that competition  
38 may not alleviate drug shortages.  
39  
40  
41  
42  
43  
44

45 The reasons behind drug shortages are complex and many factors may contribute simultaneously. In  
46 France, the increase in drug shortage reports may partly be linked to changes in regulations. Since  
47 2012, marketing authorization holders are required to report shortages and otherwise subjected to  
48 financial sanctions since 2016. Yet, not all drugs were affected by shortage in our study, which goes  
49 beyond regulatory changes and is more concordant with increased needs along with inadequate  
50 production and supply issues. Raw material shortages and production issues have been considered  
51 global and as having similar impacts in European countries.<sup>3 4 12</sup> Manufacturing problems stem from  
52 concentration and rationalization of pharmaceutical manufacturing, as well as globalization.<sup>3</sup> In our  
53 study, material and manufacturing issues were the main causes of shortages each year and a rise in  
54 shortages related to pharmaceutical market was observed over the years. One explanation may be a  
55  
56  
57  
58  
59  
60

1  
2  
3 rise in the global use of pharmaceutical products worldwide. The structure of the pharmaceutical  
4 market was previously found to be a key determinant of drug shortages in Finland.<sup>12</sup> In our study,  
5 pharmaceutical market issues included hospital trade and competitive bidding tenders that may  
6 contribute to compromise the supply of MTI drugs at hospital.  
7  
8  
9

10 Some limitations to the present study should be noted. First, the results were relating to shortage of  
11 MTI drugs from national stocks supplies, which may not allow generalization to all drugs, although  
12 MTI drugs include all therapeutic classes. Second, the data came were sourced from statement  
13 reports of marketing authorization holders and missing data cannot be ruled out. Yet, the financial  
14 penalty for non-compliance with mandatory declaration of marketing authorization holders limits the  
15 cases of under-reporting and shortages of MTI drugs would obviously be reported to the ANSM by  
16 health professionals or patients otherwise. Third, the data relating to effective and predicted drugs  
17 shortage may not reflect the effective short supplies, thus limiting the clinical interpretations of the  
18 present results.  
19  
20  
21  
22  
23  
24  
25

26 Strengths of the present study include the analysis of a national reporting system over a 7 years  
27 period. This is the first study to analyze and describe the issue of drug shortages in France, along with  
28 a new regulatory framework. Trends of drug shortages were described according to pharmaceutical  
29 products and INN drugs, allowing a more detailed description and interpretation of drug shortages  
30 and their causes.  
31  
32  
33  
34  
35  
36  
37

## 38 **CONCLUSION**

39 Shortages of major therapeutic of interest drugs are common and increasingly reported those last  
40 years in France. Preventive measures, including contingency plans, should particularly target former  
41 drugs, injectables, antiinfectives, nervous system, cardiovascular system drugs as well as  
42 antineoplastic and immunomodulating agents. The issue of drug shortages goes beyond national  
43 concerns. Many drugs reported on shortages being granted by a European marketing authorization.  
44 Even if the characteristics of drugs and reasons of shortages found in the present study are likely to  
45 be generalized to Europe, further studies are needed to address drug shortages at the European  
46 level. Reporting of drug shortages has been required to be standardized between all European  
47 member States as well as coordination of legal and organizational strategies.<sup>3 4</sup> A European  
48 collaboration (Task Force) set up by the European Medicine Agency is ongoing since 2016, to provide  
49 support and advice to tackle disruptions in supply of medicines and ensure their continued  
50 availability.<sup>30</sup>  
51  
52  
53  
54  
55  
56  
57  
58  
59  
60

**Contributors**

AB contributed to data collection and data analysis. PM designed the project. SI, CRC and PM contributed to study methods. All authors contributed to the interpretation of data and to the writing of the manuscript.

**Funding :**

none

**Acknowledgments/disclaimer**

The authors thank the drug shortages team and the surveillance division of the French National Agency for Medicine and Health Product Safety. They also would like to thank N. Marpillat as medical writer, as well as professors' team of Strasbourg Faculty of Pharmacy.

**Competing interests :**

None

## REFERENCES

1. Gray A, Manasse HR, Jr. Shortages of medicines: a complex global challenge. *Bull World Health Organ* 2012;90:158-A.
2. Fox ER, Sweet BV, Jensen V. Drug shortages: a complex health care crisis. *Mayo Clin Proc* 2014;89:361-73.
3. Bogaert P, Bochenek T, Prokop A, Pilc A. A Qualitative Approach to a Better Understanding of the Problems Underlying Drug Shortages, as Viewed from Belgian, French and the European Union's Perspectives. *PLoS One* 2015;10:e0125691.
4. Pauwels K, Huys I, Casteels M, Simoens S. Drug shortages in European countries: a trade-off between market attractiveness and cost containment? *BMC Health Serv Res* 2014;14:438.
5. Yang C, Wu L, Cai W et al. Current situation, determinants, and solutions to drug shortages in Shaanxi province, China: a qualitative study. *PLoS One* 2016;11:e0165183.
6. Morris S. Medicine shortages in Australia - what are we doing about them? *Aust Prescr* 2018;41:136-7.
7. Bauters T, Claus BO, Norga K, Huys I, Simoens S, Laureys G. Chemotherapy drug shortages in paediatric oncology: A 14-year single-centre experience in Belgium. *J Oncol Pharm Pract* 2016;22:766-70.
8. WHO. Meeting report: technical definitions of shortages and stock outs of medicines and vaccines. 2016.
9. Rider AE, Templet DJ, Daley MJ, Shuman C, Smith LV. Clinical dilemmas and a review of strategies to manage drug shortages. *J Pharm Pract* 2013;26:183-91.
10. McLaughlin M, Kotis D, Thomson K et al. Effects on patient care caused by drug shortages: a survey. *J Manag Care Pharm* 2013;19(9):783-8.
11. Fox ER, Tyler LS. Potential association between drug shortages and high-cost medications. *Pharmacotherapy* 2017;37(1):36-42.
12. Heiskanen K, Ahonen R, Kanerva R, Karttunen P, Timonen J. The reasons behind medicine shortages from the perspective of pharmaceutical companies and pharmaceutical wholesalers in Finland. *PLoS One* 2017;12:e0179479.
13. De Weerd E, Simoens S, Hombroeckx L, Casteels M, Huys I. Causes of drug shortages in the legal pharmaceutical framework. *Regul Toxicol Pharmacol* 2015;71:251-8.
14. Decree 2012-1096 of September 2012 on the supply of medicines for human use. Official Journal of the French Republic of 30th September 2012.
15. Act No 2016-41 of the 26th January 2016 on the modernization of the French healthcare system. Official Journal of the French Republic of 27th January 2016.
16. Bocquet F, Degrasat-Theas A, Peigne J, Paubel P. The new regulatory tools of the 2016 Health Law to fight drug shortages in France. *Health Policy* 2017;121:471-6.
17. Griffith MM, Gross AE, Sutton SH et al. The impact of anti-infective drug shortages on hospitals in the United States: trends and causes. *Clin Infect Dis* 2012;54:684-91.
18. Hawley KL, Mazer-Amirshahi M, Zocchi MS, Fox ER, Pines JM. Longitudinal trends in U.S. drug shortages for medications used in emergency departments (2001-2014). *Acad Emerg Med* 2016;23:63-9.
19. Mazer-Amirshahi M, Goyal M, Umar SA et al. U.S. drug shortages for medications used in adult critical care (2001-2016). *J Crit Care* 2017;41:283-8.
20. Mazer-Amirshahi M, Pourmand A, Singer S, Pines JM, van den Anker J. Critical drug shortages: implications for emergency medicine. *Acad Emerg Med* 2014;21:704-11.
21. WHO Collaborating Centre for Drug Statistics Methodology. ATC/DDC Index 2018. [www.whocc.no/atc\\_ddd\\_index/](http://www.whocc.no/atc_ddd_index/).

- 1  
2  
3 22. French Agency of Medicine and Health Product Safety : annual activity report.  
4 [https://www.ansm.sante.fr/var/ansm\\_site/storage/original/application/8c5a443c987ce4040](https://www.ansm.sante.fr/var/ansm_site/storage/original/application/8c5a443c987ce404048ed5af9d1b73cc.pdf)  
5 [48ed5af9d1b73cc.pdf](https://www.ansm.sante.fr/var/ansm_site/storage/original/application/8c5a443c987ce404048ed5af9d1b73cc.pdf).  
6  
7 23. Drug shortages statistics. [https://www.ashp.org/drug-shortages/shortage-resources/drug-](https://www.ashp.org/drug-shortages/shortage-resources/drug-shortages-statistics)  
8 [shortages-statistics](https://www.ashp.org/drug-shortages/shortage-resources/drug-shortages-statistics).  
9  
10 24. Quadri F, Mazer-Amirshahi M, Fox ER et al. Antibacterial drug shortages from 2001 to 2013:  
11 implications for clinical practice. *Clin Infect Dis* 2015;60(12):1737-42.  
12  
13 25. Pauwels K, Simoens S, Casteels M, Huys I. Insights into European drug shortages: a survey of  
14 hospital pharmacists. *PLoS One* 2015;10:e0119322.  
15  
16 26. Parsons HM, Schmidt S, Karnad AB, Liang Y, Pugh MJ, Fox ER. Association between the  
17 number of suppliers for critical antineoplastics and drug shortages: implications for future  
18 drug shortages and treatment. *J Oncol Pract* 2016;12:e289-98, 49-50.  
19  
20 27. Gogineni K, Shuman KL, Emanuel EJ. Survey of oncologists about shortages of cancer drugs. *N*  
21 *Engl J Med* 2013;369:2463-4.  
22  
23 28. French National Agency of Medicine and Health Product Safety : [www.valsartan-info.fr](http://www.valsartan-info.fr).  
24  
25 29. Reed BN, Fox ER, Konig M et al. The impact of drug shortages on patients with cardiovascular  
26 disease: causes, consequences, and a call to action. *Am Heart J* 2016;175:130-41.  
27  
28 30. European Medicine Agency. Towards improving the availability of medicines in the EU. 2018 :  
29 [https://www.ema.europa.eu/en/documents/press-release/towards-improving-availability-](https://www.ema.europa.eu/en/documents/press-release/towards-improving-availability-medicines-eu_en.pdf)  
30 [medicines-eu\\_en.pdf](https://www.ema.europa.eu/en/documents/press-release/towards-improving-availability-medicines-eu_en.pdf).  
31  
32  
33  
34  
35  
36  
37  
38  
39  
40  
41  
42  
43  
44  
45  
46  
47  
48  
49  
50  
51  
52  
53  
54  
55  
56  
57  
58  
59  
60



**Table 1 Characteristics of pharmaceutical products reported on shortage in 2012-2018**

|                                                     | <b>2012-2018</b>  |
|-----------------------------------------------------|-------------------|
|                                                     | <b>n (%)</b>      |
| <b>Total</b>                                        | <b>3530 (100)</b> |
| <b>Marketing authorization procedures</b>           |                   |
| National                                            | 2217 (62.8)       |
| European                                            | 1249 (35.4)       |
| <b>Duration of marketing authorization grants</b>   |                   |
| > 10 years                                          | 2237 (63.4)       |
| ≤ 10 years                                          | 1212 (34.3)       |
| <b>Pharmaceutical forms</b>                         |                   |
| Oral                                                | 1529 (43.3)       |
| Injectable                                          | 1675 (47.5)       |
| Others                                              | 326 (9.2)         |
| <b>Storage conditions</b>                           |                   |
| Ambient temperature                                 | 2994 (85)         |
| +2°C < Temperature < +8°C                           | 533 (16)          |
| <b>ATC Classes</b>                                  |                   |
| Alimentary tract and metabolism                     | 217 (6.1)         |
| Antiinfectives for systemic use                     | 634 (18)          |
| Antineoplastic and immunomodulating agents          | 367 (10.4)        |
| Antiparasitic products, insecticides and repellents | 39 (1.1)          |
| Blood and blood forming organs                      | 312 (8.8)         |
| Cardiovascular system                               | 442 (12.5)        |
| Dermatologicals                                     | 59 (1.6)          |
| Genitourinary system and reproductive hormones      | 151 (4.3)         |
| Musculoskeletal system                              | 155 (4.4)         |
| Nervous system                                      | 613 (17.4)        |
| Respiratory system                                  | 119 (3.4)         |
| Sensory organs                                      | 97 (2.8)          |
| Systemic hormonal preparations                      | 160 (4.5)         |
| Various/others                                      | 165 (4.7)         |



1  
2  
3 **Figure 1 Trends in shortages by numbers of pharmaceutical products and International Nonproprietary**  
4 **Name drugs (INN) (2012-2018)**  
5  
6

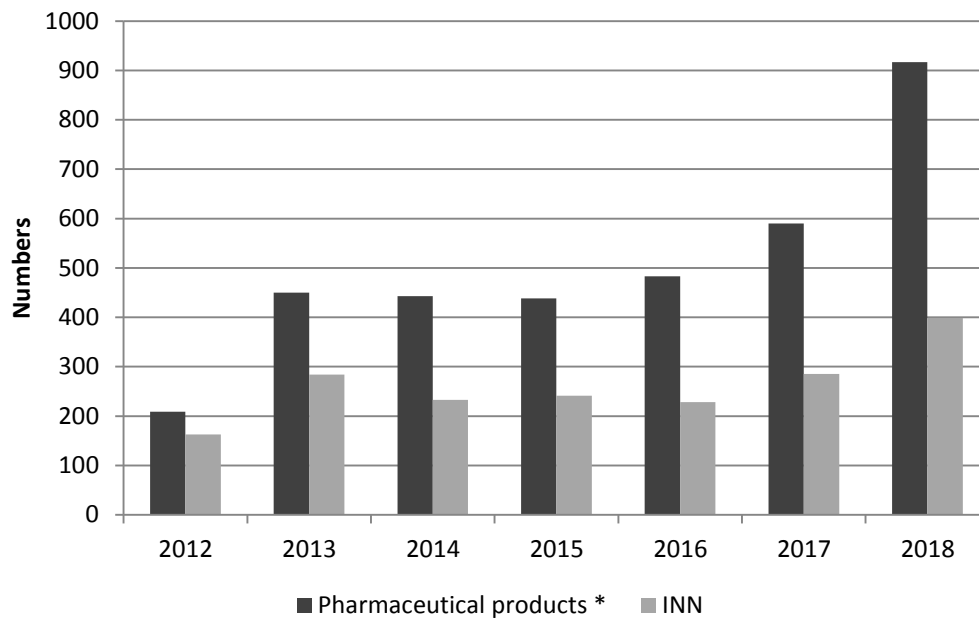

\* **Pharmaceutical products:** defined by a combination of the International Nonproprietary Name (INN), the formulation and the packaging

review only

**Figure 2 Trends in the proportion of pharmaceutical products on shortage by ATC classes (2012-2018)**

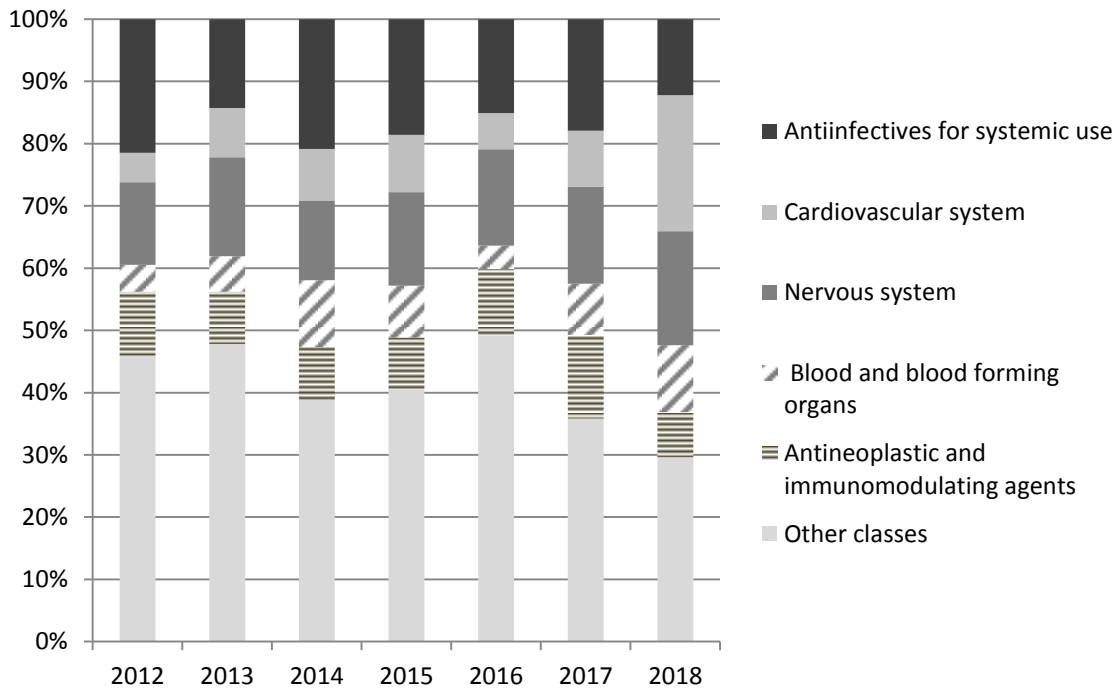

For review only

1  
2  
3  
4  
5  
6  
7  
8  
9  
10  
11  
12  
13  
14  
15  
16  
17  
18  
19  
20  
21  
22  
23  
24  
25  
26  
27  
28  
29  
30  
31  
32  
33  
34  
35  
36  
37  
38  
39  
40  
41  
42  
43  
44  
45  
46  
47  
48  
49  
50  
51  
52  
53  
54  
55  
56  
57  
58  
59  
60

**Figure 3 Trends in the proportion of pharmaceutical products on shortage by duration of marketing authorization grants (2012-2018)**

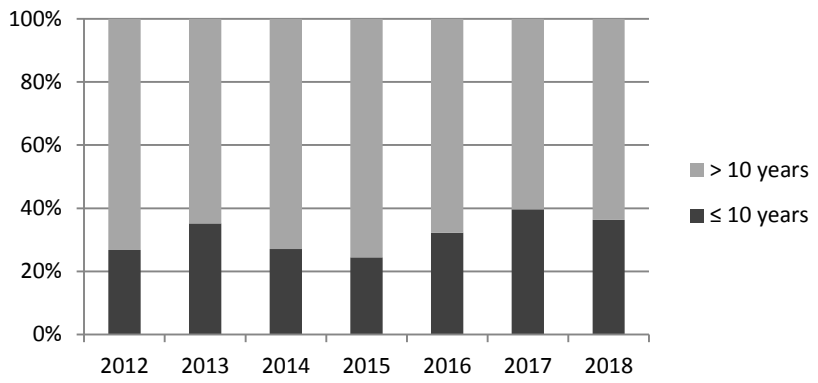

Or peer review only

Figure 4 Trends in the causes of shortages (pharmaceutical products) (2015-2018)

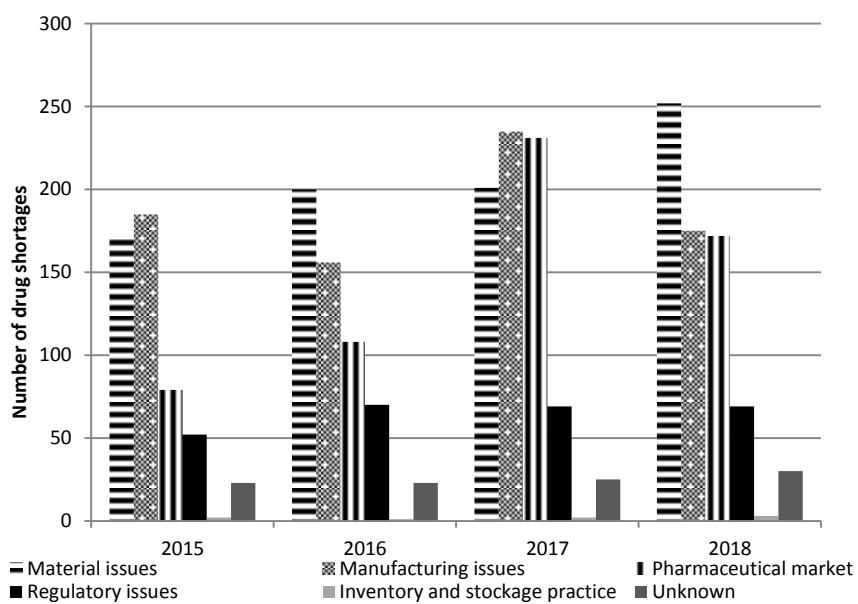

Peer review only

**STROBE Statement**—Checklist of items that should be included in reports of *cross-sectional studies*

## The French reporting system for drug shortages: description and trends from 2012 to 2018

|                              | Item No | Recommendation                                                                                                                                                                                 |    | Page number     |
|------------------------------|---------|------------------------------------------------------------------------------------------------------------------------------------------------------------------------------------------------|----|-----------------|
| <b>Title and abstract</b>    | 1       | (a) Indicate the study's design with a commonly used term in the title or the abstract                                                                                                         | OK | 2 of 19         |
|                              |         | (b) Provide in the abstract an informative and balanced summary of what was done and what was found                                                                                            | OK | 2 of 19         |
| <b>Introduction</b>          |         |                                                                                                                                                                                                |    |                 |
| Background/rationale         | 2       | Explain the scientific background and rationale for the investigation being reported                                                                                                           | OK | 3 of 19         |
| Objectives                   | 3       | State specific objectives, including any prespecified hypotheses                                                                                                                               | OK | 3 & 4 of 19     |
| <b>Methods</b>               |         |                                                                                                                                                                                                |    |                 |
| Study design                 | 4       | Present key elements of study design early in the paper                                                                                                                                        | OK | 4 of 19         |
| Setting                      | 5       | Describe the setting, locations, and relevant dates, including periods of recruitment, exposure, follow-up, and data collection                                                                | OK | 4 of 19         |
| Participants                 | 6       | (a) Give the eligibility criteria, and the sources and methods of selection                                                                                                                    | OK | 4 of 19         |
| Variables                    | 7       | Clearly define all outcomes                                                                                                                                                                    | OK | 4 of 19         |
| Data sources/<br>measurement | 8*      | For each variable of interest, give sources of data and details of methods of assessment (measurement).                                                                                        | OK | 4 of 19         |
| Bias                         | 9       | Describe any efforts to address potential sources of bias                                                                                                                                      | OK | 4 of 19         |
| Study size                   | 10      | Explain how the study size was arrived at                                                                                                                                                      | OK | 4 of 19         |
| Quantitative variables       | 11      | Explain how quantitative variables were handled in the analyses. If applicable, describe which groupings were chosen and why                                                                   | OK | 4 of 19         |
| Statistical methods          | 12      | (a) Describe all statistical methods, including those used to control for confounding                                                                                                          | OK | 4 of 19         |
|                              |         | (b) Describe any methods used to examine subgroups and interactions                                                                                                                            | OK | 4 of 19         |
|                              |         | (c) Explain how missing data were addressed                                                                                                                                                    | OK | 4 of 19         |
|                              |         | (d) If applicable, describe analytical methods taking account of sampling strategy                                                                                                             | NA | NA              |
|                              |         | (e) Describe any sensitivity analyses                                                                                                                                                          | NA | NA              |
| <b>Results</b>               |         |                                                                                                                                                                                                |    |                 |
| Participants                 | 13*     | (a) Report numbers of products at each stage of study—eg numbers potentially eligible, examined for eligibility, confirmed eligible, included in the study, completing follow-up, and analysed | OK | 5 & 13 of study |
|                              |         | (b) Give reasons for non-participation at each stage                                                                                                                                           | NA | NA              |
|                              |         | (c) Consider use of a flow diagram                                                                                                                                                             | NA | NA              |
| Descriptive data             | 14*     | (a) Give characteristics of study participants (eg demographic, clinical, social) and information on exposures and potential confounders                                                       | NA | NA              |

|                          |     |                                                                                                                                                                                                              |    |                |
|--------------------------|-----|--------------------------------------------------------------------------------------------------------------------------------------------------------------------------------------------------------------|----|----------------|
|                          |     | (b) Indicate number of products with missing data for each variable of interest                                                                                                                              | OK | 5 of 19        |
| Outcome data             | 15* | Report numbers of outcome events or summary measures                                                                                                                                                         | NA | NA             |
| Main results             | 16  | (a) Give unadjusted estimates and, if applicable, confounder-adjusted estimates and their precision (eg, 95% confidence interval). Make clear which confounders were adjusted for and why they were included | NA | NA             |
|                          |     | (b) Report category boundaries when continuous variables were categorized                                                                                                                                    | NA | NA             |
|                          |     | (c) If relevant, consider translating estimates of relative risk into absolute risk for a meaningful time period                                                                                             | NA | NA             |
| Other analyses           | 17  | Report other analyses done—eg analyses of subgroups and interactions, and sensitivity analyses                                                                                                               | OK | 14 to 17 of 19 |
| <b>Discussion</b>        |     |                                                                                                                                                                                                              |    |                |
| Key results              | 18  | Summarise key results with reference to study objectives                                                                                                                                                     | OK | 7 of 19        |
| Limitations              | 19  | Discuss limitations of the study, taking into account sources of potential bias or imprecision. Discuss both direction and magnitude of any potential bias                                                   | OK | 9 of 19        |
| Interpretation           | 20  | Give a cautious overall interpretation of results considering objectives, limitations, multiplicity of analyses, results from similar studies, and other relevant evidence                                   | OK | 9 of 19        |
| Generalisability         | 21  | Discuss the generalisability (external validity) of the study results                                                                                                                                        | OK | 9 of 19        |
| <b>Other information</b> |     |                                                                                                                                                                                                              |    |                |
| Funding                  | 22  | Give the source of funding and the role of the funders for the present study and, if applicable, for the original study on which the present article is based                                                | OK | 10 of 19       |

\*Give information separately for exposed and unexposed groups.

**Note:** An Explanation and Elaboration article discusses each checklist item and gives methodological background and published examples of transparent reporting. The STROBE checklist is best used in conjunction with this article (freely available on the Web sites of PLoS Medicine at <http://www.plosmedicine.org/>, Annals of Internal Medicine at <http://www.annals.org/>, and Epidemiology at <http://www.epidem.com/>). Information on the STROBE Initiative is available at [www.strobe-statement.org](http://www.strobe-statement.org).

# BMJ Open

## The French reporting system for drug shortages: description and trends from 2012 to 2018. An observational retrospective study

|                                 |                                                                                                                                                                                                                                                                                                         |
|---------------------------------|---------------------------------------------------------------------------------------------------------------------------------------------------------------------------------------------------------------------------------------------------------------------------------------------------------|
| Journal:                        | <i>BMJ Open</i>                                                                                                                                                                                                                                                                                         |
| Manuscript ID                   | bmjopen-2019-034033.R1                                                                                                                                                                                                                                                                                  |
| Article Type:                   | Original research                                                                                                                                                                                                                                                                                       |
| Date Submitted by the Author:   | 27-Nov-2019                                                                                                                                                                                                                                                                                             |
| Complete List of Authors:       | Benhabib, Amine; French Health Products Safety Agency; University of Strasbourg Faculty of Pharmacy<br>Ioughlissen, Saïd; French Health Products Safety Agency<br>Ratignier-Carbonneil, Christelle; French Health Products Safety Agency<br>MAISON, Patrick; French Health Products Safety Agency; CHIC |
| <b>Primary Subject Heading</b>: | Public health                                                                                                                                                                                                                                                                                           |
| Secondary Subject Heading:      | Health policy, Global health                                                                                                                                                                                                                                                                            |
| Keywords:                       | Drug shortages, supply of medicines, short supply, major therapeutic interest, pharmacosurveillance, France                                                                                                                                                                                             |
|                                 |                                                                                                                                                                                                                                                                                                         |

SCHOLARONE™  
Manuscripts



I, the Submitting Author has the right to grant and does grant on behalf of all authors of the Work (as defined in the below author licence), an exclusive licence and/or a non-exclusive licence for contributions from authors who are: i) UK Crown employees; ii) where BMJ has agreed a CC-BY licence shall apply, and/or iii) in accordance with the terms applicable for US Federal Government officers or employees acting as part of their official duties; on a worldwide, perpetual, irrevocable, royalty-free basis to BMJ Publishing Group Ltd ("BMJ") its licensees and where the relevant Journal is co-owned by BMJ to the co-owners of the Journal, to publish the Work in this journal and any other BMJ products and to exploit all rights, as set out in our [licence](#).

The Submitting Author accepts and understands that any supply made under these terms is made by BMJ to the Submitting Author unless you are acting as an employee on behalf of your employer or a postgraduate student of an affiliated institution which is paying any applicable article publishing charge ("APC") for Open Access articles. Where the Submitting Author wishes to make the Work available on an Open Access basis (and intends to pay the relevant APC), the terms of reuse of such Open Access shall be governed by a Creative Commons licence – details of these licences and which [Creative Commons](#) licence will apply to this Work are set out in our licence referred to above.

Other than as permitted in any relevant BMJ Author's Self Archiving Policies, I confirm this Work has not been accepted for publication elsewhere, is not being considered for publication elsewhere and does not duplicate material already published. I confirm all authors consent to publication of this Work and authorise the granting of this licence.



1  
2  
3 **The French reporting system for drug shortages: description and trends from 2012 to 2018.**  
4 **An observational retrospective study**  
5  
6  
7  
8  
9

10  
11 Amine Benhabib,<sup>1, 2</sup> Said Ioughlissen, <sup>1</sup> Christelle Ratignier-Carbonneil, <sup>1</sup> Patrick Maison<sup>1, 3</sup>  
12

13  
14  
15 <sup>1</sup> French National Agency for Medicines and Health Products Safety (ANSM), Saint-Denis, France

16  
17 <sup>2</sup> Strasbourg Faculty of Pharmacy, Illkirch-Graffenstaden, France

18  
19 <sup>3</sup> EA 7379, Paris Est Creteil University (UPEC) and CHIC Hospital, Créteil, France  
20  
21  
22  
23

24 Correspondance to: Patrick Maison, Agence Nationale de Sécurité des Médicaments et des Produits  
25 de Santé, 143-147 bd, Anatole France, F-93285 Saint-Denis Cedex ; Tel +331 55 87 35 23 ; Fax +331  
26 55 87 35 23 ; Email : patrick.maison@ansm.sante.fr  
27  
28  
29

30  
31 **Running head:** The French reporting system for drug shortages  
32

33  
34  
35 **Keywords:** Drug shortages, supply of medicines, short supply, major therapeutic interest,  
36 pharmacosurveillance, France, national reporting system  
37  
38  
39

40  
41 **Word count:** *(excluding the abstract, references, tables, boxes, or figures): 3039*  
42  
43  
44

45 **Numbers of tables and figures:** 5  
46  
47  
48  
49  
50  
51  
52  
53  
54  
55  
56  
57  
58  
59  
60

## ABSTRACT

### Objectives

The aim was to provide figures for drug shortages in France and describe their characteristics, causes, and trends between 2012 and 2018.

### Methods

Data from the national reporting system from the Agency of Medicine and Health Product Safety (ANSM) was analyzed. This database contains information regarding effective and predicted shortages of major therapeutic of interest (MTI) drugs (*i.e.* drugs whose shortage would be life-threatening or representing a loss of treatment opportunity for patients with a severe disease) which are mandatory reported by marketing authorization holders to the ANSM. Data are presented as numbers or percentages of pharmaceutical products (*i.e.* the product name and its formulation) reported on shortage between 2012 and 2018.

### Results

There were 3530 pharmaceutical products reported on shortage during the period, including 1833 different active substances. Drugs on shortage were mostly old products (63.4%) with national marketing authorization procedures (62.8%), as well as injectable and oral forms (47.5% and 43.3%, respectively). Antiinfectives for systemic use ranked first (18%), followed by nervous and cardiovascular system drugs and by antineoplastic and immunomodulating agents (respectively 17.4%, 12.5% and 10.4%). The number of reported shortages presented a 4-fold increase between 2012 and 2018 and a sharp rise in 2017&2018, along with a rise in the number of active substances on shortage. The therapeutic classes concerned remained similar over time. Manufacturing and material supply issues were the main reported reasons for the shortage each year (30%) and there was an overall rise of pharmaceutical market reasons.

### Conclusion

Drug shortages were increasingly reported in France. Preventive measures should specifically target the products the most on shortage, in particular old drugs, injectable, antiinfective, nervous system and cardiovascular system drugs as well as antineoplastic and immunomodulating agents.

### Strengths and Limitations

- Very few data quantifying drug shortages are published in the scientific literature especially in Europe.
- This is the first study to describe and analyses drug shortages in France using a national reporting system over a 7 years period.
- Trends of drug shortages were described according to both pharmaceutical products (defined as a combination of the active substance, the formulation and the packaging) and International Nonproprietary Name drugs, allowing a more detailed description and interpretation of drug shortages and their causes.
- The present study is restricted to shortages of Major Therapeutic of Interest (MTI) drugs from national stocks supplies, which may not allow generalization to all drugs.
- This study is limited to drug shortages and may not address the issue of effective short supplies, thus limiting the clinical interpretations of the present results.

## INTRODUCTION

Drug shortages are a major public health threat worldwide occurring in all therapeutic classes.<sup>1-7</sup> According to the WHO, a drug shortage is defined as an insufficiency in the supply of medicines, health products and vaccines that are identified by the health system as essential to meet public health and patient need.<sup>8</sup> Drug shortages can have detrimental effects on patients care as they may result in delayed treatment or switches into alternative therapies, therefore leading to disease progression, increased risk of adverse effects or medication errors as well as rising healthcare costs.<sup>9-11</sup> Multiple reasons, such as manufacturing issues, regulatory issues or economic factors, in addition to increased global demand have been suggested to underlie drug shortages.<sup>1, 3, 12, 13</sup>

In France, the management of drug shortages and short supply was first regulated in 2012 with a decree dated September 28<sup>th</sup>, 2012 on the supply of human drugs.<sup>14</sup> This decree requires the pharmaceutical operators commercializing drugs in France to ensure an appropriate and continuous supply of wholesalers and hospitals within 72 hours. Marketing authorization holders were thus mandated to notify the French National Agency of Medicine and Health Product Safety (*Agence Nationale de Sécurité du Médicament et des produits de santé* – ANSM) of any effective or predicted drug shortages, specifying the available stocks, the estimated period of shortage, the deadline for the availability of the product, as well as the substitute drugs. In 2016, the French health law of January 26<sup>th</sup> and its decree of July 20<sup>th</sup> targeted the shortages of drugs of major therapeutic of interest (MTI) defined as drugs for which unavailability would be life-threatening or represent a loss of treatment opportunity.<sup>15</sup> The list of the therapeutic classes of MTI drugs was provided by the ministerial order of July 27<sup>th</sup> (Supplementary materials).<sup>16</sup> The shortage of an MTI drug has to be reported by the marketing authorization holder (MAH) to the ANSM even when another competing equivalent MTI drug is available. MAH are not aware of the productions capacities of other MAHs and thus of the availability of equivalent MIT drugs at the time of the report. The impact of a shortage in terms of public health and production is then estimated by the ANSM. The decree of July 20<sup>th</sup> also warranted new regulatory tools in order to reinforce the legal obligations of pharmaceutical companies and wholesalers. Marketing authorization holders and operators were required to develop shortage management plans (*Plan de Gestion des Pénuries* – PGP), and wholesalers were not allowed to export MTI drugs that are on effective or predicted shortage. Responsibilities of pharmaceutical operators were also strengthened by the implementation of administrative or financial penalties in case of non-compliance.<sup>15, 17</sup>

1  
2  
3 According to a survey conducted in 2014, drug shortages were increasingly reported in Europe and  
4 occurred daily or weekly.<sup>3</sup> While the issue of drug shortages has been widely studied in the USA,<sup>18-21</sup>  
5 figures in Europe are scarce and national trends of drug shortages are not available.<sup>22</sup> The  
6 identification and surveillance of the most frequent drugs on shortage and the analysis of their  
7 causes may allow implementing targeted preventive measures in order to limit the negative impacts  
8 on patient care. The present study therefore aimed to describe the characteristics and trends of  
9 reported shortages of MTI drugs in France using the national reporting system from the Agency of  
10 Medicine and Health Product Safety (ANSM).  
11  
12  
13  
14  
15  
16  
17  
18  
19

## 20 **METHODS**

21  
22  
23  
24  
25 This observational retrospective study analyzed the surveillance reporting system of drug shortages  
26 from the French National Agency of Medicine and Health Product Safety (ANSM) between 2012 and  
27 2018. Since 2012, marketing authorization holders are indeed obliged to declare any effective or  
28 predicted shortage of MTI drugs to the ANSM. The reporting database contains the information  
29 reported by the marketing authorization holders via completed declaration forms. The following data  
30 were analyzed: (1) from declaration forms: dates of report, drugs names, active substances  
31 (International Nonproprietary Names (INN)), routes of administration, setting first impacted by the  
32 shortage (community pharmacy and/or hospital), reasons for the shortages (available since 2015); (2)  
33 from the marketing authorization dossier and the summary of the product characteristics: dates and  
34 procedures of marketing authorization grants, storage conditions; and (3) ATC codes according to the  
35 WHO Collaborating Centre for Drug Statistics Methodology.<sup>23</sup>  
36  
37  
38  
39  
40  
41  
42  
43

44 At the time of the report of shortage, depending on the stocks, the shortage may be predictive or  
45 become effective in a few hours and vice versa. Drug shortage reports were therefore defined as  
46 both effective and predicted shortages of MTI drugs recorded by the ANSM each year.  
47  
48  
49

50 According to the definition of drug shortage in France, short supply was not considered in present  
51 study. A drug shortage reflects the capacity of a pharmaceutical company to produce drugs in  
52 accordance to the authorities' scope whereas a short supply assesses the sanitary risk in the scope of  
53 the pharmacy practice.  
54  
55  
56

57 Duration of the marketing authorization grant was defined as the difference between the years of  
58 the shortage reports and the year when the marketing authorization was granted.  
59  
60

1  
2  
3  
4  
5  
6 Causes of shortages were categorized into: (1) manufacturing issues, including the stage of  
7 manufacturing or packaging of the final product ; (2) material issues, *i.e.*, defect in raw materials,  
8 excipients, packaging and semi-finished or bulk pharmaceuticals ; (3) pharmaceutical market, *i.e.*,  
9 related to the difficulty of the operator to purchase products, including insufficient production  
10 capacity ; (4) regulatory issues, *i.e.*, new regulation directly related to the delayed marketing ; and (5)  
11 inventory and storage practices, *i.e.*, stock errors or inappropriate management of expiry date.  
12  
13  
14  
15

16 Data were presented in numbers or in percentages of pharmaceutical products reported on  
17 shortage. Pharmaceutical products were defined as a combination of the International  
18 Nonproprietary Name (INN), the formulation and the packaging and are identified by the *code*  
19 *identifiant de spécialité* (CIS). Therefore, a shortage of a pharmaceutical product does not necessarily  
20 imply the shortages of all drugs with the same INN.  
21  
22  
23  
24

25  
26 There were no missing data except for marketing authorization procedures and duration of  
27 marketing authorization grants.  
28  
29

### 30 **Patient and public involvement**

31  
32 No patient involved  
33  
34

## 35 **RESULTS**

36  
37  
38  
39  
40 Between the years 2012 and 2018, 3530 pharmaceutical products were reported of on shortage,  
41 including 1833 different International Nonproprietary Name (INN) drugs. The overall characteristics  
42 of the pharmaceutical products reported on shortage from 2012 to 2018 are presented in **table 1**.  
43 Drugs with a marketing authorization granted more than 10 years ago (63.4%) and according to a  
44 national procedure (62.8%) were the most concerned. Generics drugs accounted for 34% of  
45 shortages overall and for 17% of old drugs (marketing authorization grant > 10 years). Community  
46 pharmacies and hospitals were similarly first impacted by shortages. Injectable and oral were the  
47 most commonly affected forms (with respectively 47.5% and 43.3%). With regards to ATC classes,  
48 antiinfectives for systemic use ranked first with 18% of total shortage reports, followed by nervous  
49 and cardiovascular system drugs as well as by antineoplastic and immunomodulating agents (with  
50 respectively 17.4%, 12.5% and 10.4) (**table 1**). Antibacterial for systemic use and vaccines accounted  
51 for 53% and 19% of antiinfectives shortages, respectively. Antiepileptic, anesthetic and analgesic  
52  
53  
54  
55  
56  
57  
58  
59  
60

1  
2  
3 products were among the most common nervous system drugs on shortage (22%, 18% and 16%,  
4 respectively). Cephalosporins were the most common antibacterial drug class reported on shortage.  
5  
6

7 Trends in the number of pharmaceutical products and INN drugs reported on shortage were shown  
8 in **figure 1**. There was a 4-fold increase in the total products on shortage between 2012 and 2018, to  
9 reach 917 shortages in 2018. The numbers of INN on shortage were similar in 2013 and 2017 but  
10 presented a 2-fold increase between the years 2012 and 2018, to reach a peak in 2018 (n=399)  
11 (**figure 1**).  
12  
13  
14

15  
16 Injectable and oral forms remained the two main pharmaceutical forms on shortage each year (from  
17 51% to 37% and 40% to 56% between 2012 and 2018 for injectable and oral forms, respectively).  
18  
19

20  
21 All therapeutic classes were reported on shortage each year. **Figure 2** presents the trends in  
22 proportions of shortage of pharmaceutical products by ATC classes from 2012 to 2018. The  
23 distribution of ATC classes reported on shortage was similar over time. Antiinfectives for systemic  
24 use, nervous system drugs as well as antineoplastic and immunomodulating agents ranked among  
25 the first classes on shortage until 2017. Shortages of cardiovascular system drugs were increasingly  
26 reported since 2012 and a sharp rise occurred in 2018 (n=216 reports). Cardiovascular drugs ranked  
27 first in 2018 (24%), explained by products of valsartan accounting for half of shortages. The  
28 proportion of nervous system drugs, antiinfectives and antineoplastic and immunomodulating agents  
29 on shortage was relatively stable over the years (**figure 2**). Yet, a continuous increase of shortages  
30 was observed for nervous system drugs that ranked second in 2018 (n=181 reports) (**figure 2**). In  
31 2018, antiepileptics accounted for the most reported class of nervous system drugs on shortage  
32 (34%), of which 13 were topiramate-based products. There was also a rise in shortages of  
33 antiinfective products in 2017 (n=122), driven in half by antibacterial drugs, in particular  
34 cephalosporins (n=23). Among antiinfectives, antibacterial drugs were the first class reported on  
35 shortage each year between 2012 and 2018, followed by vaccines (data not shown).  
36  
37  
38  
39  
40  
41  
42  
43  
44  
45

46  
47 **Figure 3** presents the trends in the proportion of shortage of pharmaceutical products by duration of  
48 marketing authorization grant from 2012 to 2018. During that period, drugs with an old marketing  
49 authorization grant (of more than 10 years) were the most reported on shortage.  
50  
51

52  
53 Drug shortages first impacting hospital settings accounted for half of the shortages in 2017 and for a  
54 third in other years. Similar trends in the proportion of shortage were observed for settings first  
55 impacted (data not shown).  
56  
57  
58  
59  
60



1  
2  
3 Trends in the reported causes of shortages between 2015 and 2018 are shown in **figure 4**.  
4 Manufacturing and material supply issues were the main reasons each year with approximately 30%  
5 of the shortage share. There was an overall rise of pharmaceutical market reasons.  
6  
7  
8  
9

## 10 11 **DISCUSSION**

12  
13  
14  
15  
16 Based on the French national reporting system, the present study described the characteristics of  
17 MTI drugs reported on shortage in France between 2012 and 2018 as mostly: old drugs, drugs with  
18 national marketing authorization procedures and injectables. Both hospital and community  
19 pharmacies were similarly affected by shortages and one third of them first occurred in hospital  
20 settings. Four therapeutic classes (antiinfectives, nervous system, cardiovascular system drugs,  
21 antineoplastics and immunomodulating agents) remained the most on shortage with the same  
22 distribution over the years. The number of pharmaceutical products reported on shortage increased  
23 by 4-fold between 2012 and 2018, along with a rise in the number of INN drugs. In 2018, the number  
24 of pharmaceutical products on shortage reached a peak, with 399 different active substances from all  
25 therapeutic classes affected by shortage. Compared with the number (n=2 800) of approved and  
26 marketed INN drugs in France in 2016,<sup>24</sup> there were approximately 13% of INN drugs on shortage in  
27 2018 and 60% during the 2012-2018 period.  
28  
29  
30  
31  
32  
33  
34  
35  
36

37 The present rise in drug shortages in France is consistent with overall trend observed in the USA,  
38 reflecting the international public health challenge of drug shortages. According to the University of  
39 Utah Drug Information Service (UUDIS), new drugs on shortage in the USA were found to triple  
40 between 2004 and 2018, although a decrease occurred since 2012.<sup>25</sup> Comparisons of figures between  
41 the two countries are yet limited by differences in definitions of drug shortage<sup>2</sup> as well as differences  
42 in pharmaceutical products, blister packaging being less used in the USA.  
43  
44  
45  
46  
47

48 The four therapeutic classes most impacted by shortages in the present study were antiinfectives for  
49 systemic use, nervous system drugs, cardiovascular drugs and antineoplastic and immunomodulating  
50 agents, in accordance with previous results from a European review finding that these same four  
51 classes represented over 50% of reported shortage.<sup>4</sup> We found that antiinfectives for systemic use  
52 represented the first therapeutic class reported on shortage until 2018 (18%) among which  
53 antibacterial drugs ranked first each year. This trend is well documented across the United States.  
54 Antimicrobials were the most common drug class on shortage in critical care (2001-2016) and  
55 emergency medicine practice (2001-2014), representing respectively 20% and 24% of US shortages.<sup>19</sup>  
56  
57  
58  
59  
60



1  
2  
3 <sup>20</sup> Cephalosporins were the most common antibacterial drug class, in accordance with findings from a  
4 US study using the UUDIS database from 2001 to 2013.<sup>26</sup> Shortages of antimicrobials may not have  
5 alternative production sources and may thus require the use of less effective or more toxic  
6 alternatives,<sup>20, 26</sup> leading to worse patient outcomes.<sup>18</sup> In a European survey, anti-infectives were also  
7 found to be the most common drugs on shortage in hospital pharmacies in 2013, along with cancer  
8 drugs.<sup>22</sup> The burden of cancer drug shortages was previously highlighted in the United States<sup>27, 28</sup> and  
9 more recently in a hospital paediatric hemato-oncology unit in Belgium.<sup>7</sup> A lack of market  
10 attractiveness and low profitability has been suggested as a cause of shortages, due to prompting the  
11 discontinuation of some long-standing or lower-priced products such as antibiotics and oncologic  
12 medicines.<sup>1</sup>

13  
14  
15  
16  
17  
18  
19  
20  
21 In the present study, cardiovascular drugs were one of the first therapeutic classes on shortage and  
22 the first in 2018 (28%). This was driven by shortages of valsartan products resulting from the  
23 detection in 2018 of impurities in the active substance of valsartan-based medicines. As a precaution,  
24 all potentially impacted batches of valsartan containing drugs were recalled in France since July  
25 2018.<sup>29</sup> Shortage of cardiovascular drugs was also common in the USA.<sup>20, 30</sup>

26  
27  
28  
29  
30 In this study, shortages mostly involved injectable products each year. This finding is consistent with  
31 previous surveys in Europe and USA.<sup>4, 20</sup> Injectable products are at increased risk of shortage related  
32 to quality control concerns because of the complexities associated with manufacturing a sterile  
33 product.<sup>2</sup> Oral drugs also accounted for a large share of shortages in our study, reflecting that causes  
34 of drug shortages goes beyond pure manufacturing problems related to technical issues or quality  
35 problems.

36  
37  
38  
39  
40 According to our results, old drugs were the most reported on shortage during the period from year  
41 2012 to year 2018, with 63.4% of drug shortages while there were 45% of old products on the market  
42 in 2018 in France. Age of the marketing authorization is thus likely to be a major determinant of drug  
43 shortage, in accordance with a US study finding that the age of drug was a strong risk factor for  
44 shortage in oncology.<sup>27</sup> According to the authors, this result suggested that policies focused  
45 predominately on promoting increases in distinct suppliers and that competition may not alleviate  
46 drug shortages.

47  
48  
49  
50  
51  
52  
53 The reasons behind drug shortages are complex and many factors may contribute simultaneously. In  
54 France, the increase in drug shortage reports may partly be linked to changes in regulations. Since  
55 2012, marketing authorization holders are required to report shortages and otherwise subjected to  
56 financial sanctions since 2016. Yet, not all drugs were affected by shortage in our study, which goes  
57 beyond regulatory changes and is more concordant with increased needs along with inadequate  
58  
59  
60

1  
2  
3 production and supply issues. Raw material shortages and production issues have been considered  
4 global and as having similar impacts in European countries.<sup>3, 4, 12</sup> Manufacturing problems stem from  
5 concentration and rationalization of pharmaceutical manufacturing, as well as globalization.<sup>3</sup> In our  
6 study, material and manufacturing issues were the main causes of shortages each year and a rise in  
7 shortages related to pharmaceutical market was observed over the years. One explanation may be a  
8 rise in the global use of pharmaceutical products worldwide. The structure of the pharmaceutical  
9 market was previously found to be a key determinant of drug shortages in Finland.<sup>12</sup> In our study,  
10 pharmaceutical market issues included hospital trade and competitive bidding tenders that may  
11 contribute to compromise the supply of MTI drugs at hospital.

12  
13  
14  
15  
16  
17  
18  
19 Some limitations to the present study should be noted. First, the results were relating to shortage of  
20 MTI drugs from national stocks supplies, which may not allow generalization to all drugs, although  
21 MTI drugs include all therapeutic classes. Second, the data were sourced from statement reports of  
22 marketing authorization holders and missing data cannot be ruled out. According to the definition of  
23 drug shortages in France, short supply was not considered in the present study. The combination of  
24 data from both authorities and pharmacy practice has been suggested to improve the surveillance.<sup>31</sup>  
25 This requires a standardization of definition of drug shortages between European members. Yet, the  
26 financial penalty for non-compliance with mandatory declaration of marketing authorization holders  
27 limits the cases of under-reporting and shortages of MTI drugs would obviously be reported to the  
28 ANSM by health professionals or patients otherwise. Third, the data relating to effective and  
29 predicted drugs shortage may not reflect the effective short supplies, thus limiting the clinical  
30 interpretations of the present results.

31  
32  
33  
34  
35  
36  
37  
38  
39  
40  
41  
42  
43  
44  
45  
46  
47  
48  
49  
50  
51  
52  
53  
54  
55  
56  
57  
58  
59  
60  
Strengths of the present study include the analysis of a national reporting system over a 7 years  
period. This is the first study to analyze the issue of drug shortages in France. Trends of drug  
shortages were described according to pharmaceutical products and INN drugs, allowing a more  
detailed description and interpretation of drug shortages and their causes.

Reporting of drug shortages has been required to be standardized between all European member  
States as well as coordination of legal and organizational strategies.<sup>3, 4</sup> A European collaboration  
(Task Force) set up by the European Medicine Agency is ongoing since 2016, to provide support and  
advice to tackle disruptions in supply of medicines and ensure their continued availability.<sup>32</sup>

## CONCLUSION

Shortages of major therapeutic of interest drugs are common and increasingly reported those last  
years in France. Preventive measures, including contingency plans, should particularly target old

1  
2  
3 drugs, injectables, antiinfectives, nervous system, cardiovascular system drugs as well as  
4 antineoplastic and immunomodulating agents. The issue of drug shortages goes beyond national  
5 concerns. Many drugs reported on shortages being granted by a European marketing authorization.  
6  
7 Even if the characteristics of drugs and reasons of shortages found in the present study are likely to  
8 be generalized to Europe, further studies are needed to address drug shortages at the European  
9 level.  
10  
11  
12  
13  
14  
15  
16  
17  
18  
19  
20  
21  
22  
23  
24  
25  
26  
27  
28  
29  
30  
31  
32  
33  
34  
35  
36  
37  
38  
39  
40  
41  
42  
43  
44  
45  
46  
47  
48  
49  
50  
51  
52  
53  
54  
55  
56  
57  
58  
59  
60

For peer review only  
CONFIDENTIAL

**Contributors**

AB contributed to data collection and data analysis. PM designed the project. SI, CRC and PM contributed to methods of the study. All authors contributed to the interpretation of data and to the writing of the manuscript.

**Funding :**

none

**Acknowledgments/disclaimer**

The authors thank the drug shortages team and the surveillance division of the French National Agency for Medicine and Health Product Safety. They would also like to thank Natacha Marpillat as medical writer, as well as the professors' team of Strasbourg Faculty of Pharmacy.

**Data sharing**

Data were reported from the pharmaceutical companies and confidential

**Competing interests :**

None

## REFERENCES

1. Gray A, Manasse HR, Jr. Shortages of medicines: a complex global challenge. *Bull World Health Organ* 2012;90:158-A.
2. Fox ER, Sweet BV, Jensen V. Drug shortages: a complex health care crisis. *Mayo Clin Proc* 2014;89:361-73.
3. Bogaert P, Bochenek T, Prokop A *et al*. A Qualitative Approach to a Better Understanding of the Problems Underlying Drug Shortages, as Viewed from Belgian, French and the European Union's Perspectives. *PLoS One* 2015;10:e0125691.
4. Pauwels K, Huys I, Casteels M, *et al*. Drug shortages in European countries: a trade-off between market attractiveness and cost containment? *BMC Health Serv Res* 2014;14:438.
5. Yang C, Wu L, Cai W *et al*. Current situation, determinants, and solutions to drug shortages in Shaanxi province, China: a qualitative study. *PLoS One* 2016;11:e0165183.
6. Morris S. Medicine shortages in Australia - what are we doing about them? *Aust Prescr* 2018;41:136-7.
7. Bauters T, Claus BO, Norga K, *et al*. Chemotherapy drug shortages in paediatric oncology: A 14-year single-centre experience in Belgium. *J Oncol Pharm Pract* 2016;22:766-70.
8. WHO. Meeting report: technical definitions of shortages and stock outs of medicines and vaccines. 2016.
9. Rider AE, Templet DJ, Daley MJ, *et al*. Clinical dilemmas and a review of strategies to manage drug shortages. *J Pharm Pract* 2013;26:183-91.
10. McLaughlin M, Kotis D, Thomson K, *et al*. Effects on patient care caused by drug shortages: a survey. *J Manag Care Pharm* 2013;19(9):783-8.
11. Fox ER, Tyler LS. Potential association between drug shortages and high-cost medications. *Pharmacotherapy* 2017;37(1):36-42.
12. Heiskanen K, Ahonen R, Kanerva R, *et al*. The reasons behind medicine shortages from the perspective of pharmaceutical companies and pharmaceutical wholesalers in Finland. *PLoS One* 2017;12:e0179479.
13. De Weerd E, Simoens S, Hombroeckx L, *et al*. Causes of drug shortages in the legal pharmaceutical framework. *Regul Toxicol Pharmacol* 2015;71:251-8.
14. Decree 2012-1096 of September 2012 on the supply of medicines for human use. Official Journal of the French Republic of 30th September 2012.
15. Act No 2016-41 of the 26th January 2016 on the modernization of the French healthcare system. Official Journal of the French Republic of 27th January 2016.
16. Ministerial Order of July 27th 2016 listing the therapeutic classes comprising medicinal products of major therapeutic interest mentioned in Article L. 5121-31 of the Public Health Code.
17. Bocquet F, Degrasat-Theas A, Peigne J, *et al*. The new regulatory tools of the 2016 Health Law to fight drug shortages in France. *Health Policy* 2017;121:471-6.
18. Griffith MM, Gross AE, Sutton SH, *et al*. The impact of anti-infective drug shortages on hospitals in the United States: trends and causes. *Clin Infect Dis* 2012;54:684-91.
19. Hawley KL, Mazer-Amirshahi M, Zocchi MS, *et al*. Longitudinal trends in U.S. drug shortages for medications used in emergency departments (2001-2014). *Acad Emerg Med* 2016;23:63-9.
20. Mazer-Amirshahi M, Goyal M, Umar SA, *et al*. U.S. drug shortages for medications used in adult critical care (2001-2016). *J Crit Care* 2017;41:283-8.
21. Mazer-Amirshahi M, Pourmand A, Singer S, *et al*. Critical drug shortages: implications for emergency medicine. *Acad Emerg Med* 2014;21:704-11.

- 1
- 2
- 3 22. Pauwels K, Simoens S, Casteels M, *et al*. Insights into European drug shortages: a survey of
- 4 hospital pharmacists. *PLoS One* 2015;10:e0119322.
- 5 23. WHO Collaborating Centre for Drug Statistics Methodology. ATC/DDC Index 2018.
- 6 [www.whocc.no/atc\\_ddd\\_index/](http://www.whocc.no/atc_ddd_index/).
- 7 24. French Agency of Medicine and Health Product Safety : annual activity report.
- 8 [https://www.ansm.sante.fr/var/ansm\\_site/storage/original/application/8c5a443c987ce4040](https://www.ansm.sante.fr/var/ansm_site/storage/original/application/8c5a443c987ce404048ed5af9d1b73cc.pdf)
- 9 [48ed5af9d1b73cc.pdf](https://www.ansm.sante.fr/var/ansm_site/storage/original/application/8c5a443c987ce404048ed5af9d1b73cc.pdf).
- 10 25. Drug shortages statistics. [https://www.ashp.org/drug-shortages/shortage-resources/drug-](https://www.ashp.org/drug-shortages/shortage-resources/drug-shortages-statistics)
- 11 [shortages-statistics](https://www.ashp.org/drug-shortages/shortage-resources/drug-shortages-statistics).
- 12 26. Quadri F, Mazer-Amirshahi M, Fox ER, *et al*. Antibacterial drug shortages from 2001 to 2013:
- 13 implications for clinical practice. *Clin Infect Dis* 2015;60(12):1737-42.
- 14 27. Parsons HM, Schmidt S, Karnad AB, *et al*. Association between the number of suppliers for
- 15 critical antineoplastics and drug shortages: implications for future drug shortages and
- 16 treatment. *J Oncol Pract* 2016;12:e289-98,49-50.
- 17 28. Gogineni K, Shuman KL, Emanuel EJ. Survey of oncologists about shortages of cancer drugs. *N*
- 18 *Engl J Med* 2013;369:2463-4.
- 19 29. French National Agency of Medicine and Health Product Safety : [www.valsartan-info.fr](http://www.valsartan-info.fr).
- 20 30. Reed BN, Fox ER, Konig M, *et al*. The impact of drug shortages on patients with
- 21 cardiovascular disease: causes, consequences, and a call to action. *Am Heart J* 2016;175:130-
- 22 41.
- 23 31. Postma DJ, De Smet P, Gispens-de Wied CC, *et al*. Drug shortages from the perspectives of
- 24 authorities and pharmacy practice in the Netherlands: an observational study. *Front*
- 25 *pharmacol* 2018;9:1243.
- 26 32. European Medicine Agency. Towards improving the availability of medicines in the EU. 2018 :
- 27 [https://www.ema.europa.eu/en/documents/press-release/towards-improving-availability-](https://www.ema.europa.eu/en/documents/press-release/towards-improving-availability-medicines-eu_en.pdf)
- 28 [medicines-eu\\_en.pdf](https://www.ema.europa.eu/en/documents/press-release/towards-improving-availability-medicines-eu_en.pdf).
- 29
- 30
- 31
- 32
- 33
- 34
- 35
- 36
- 37
- 38
- 39
- 40
- 41
- 42
- 43
- 44
- 45
- 46
- 47
- 48
- 49
- 50
- 51
- 52
- 53
- 54
- 55
- 56
- 57
- 58
- 59
- 60

**Table 1 Characteristics of pharmaceutical products reported on shortage in 2012-2018**

|                                                     | <b>2012-2018</b>  |
|-----------------------------------------------------|-------------------|
|                                                     | <b>n (%)</b>      |
| <b>Total</b>                                        | <b>3530 (100)</b> |
| <b>Marketing authorization procedures</b>           |                   |
| National                                            | 2217 (62.8)       |
| European                                            | 1249 (35.4)       |
| Unavailable data                                    | 64 (1.81)         |
| <b>Duration of marketing authorization grants</b>   |                   |
| > 10 years                                          | 2237 (63.4)       |
| ≤ 10 years                                          | 1212 (34.3)       |
| Unavailable data                                    | 81 (2.30)         |
| <b>Pharmaceutical forms</b>                         |                   |
| Oral                                                | 1529 (43.3)       |
| Injectable                                          | 1675 (47.5)       |
| Others                                              | 326 (9.24)        |
| <b>Storage conditions</b>                           |                   |
| Ambient temperature                                 | 2995 (84.8)       |
| +2°C < Temperature < +8°C                           | 533 (16.0)        |
| - 18°C < Temperature                                | 2 (0.00)          |
| <b>ATC Classes</b>                                  |                   |
| Alimentary tract and metabolism                     | 217 (6.15)        |
| Antiinfectives for systemic use                     | 634 (18.0)        |
| Antineoplastic and immunomodulating agents          | 367 (10.4)        |
| Antiparasitic products, insecticides and repellents | 39 (1.10)         |
| Blood and blood forming organs                      | 312 (8.84)        |
| Cardiovascular system                               | 442 (12.5)        |
| Dermatologicals                                     | 59 (1.67)         |
| Genitourinary system and reproductive hormones      | 151 (4.30)        |
| Musculoskeletal system                              | 155 (4.40)        |
| Nervous system                                      | 613 (17.4)        |
| Respiratory system                                  | 119 (3.40)        |
| Sensory organs                                      | 97 (2.80)         |
| Systemic hormonal preparations                      | 160 (4.53)        |
| Various/others                                      | 165 (4.70)        |

**Figures legends**

Figure 1 Trends in shortages by numbers of pharmaceutical products and International Nonproprietary Name drugs (INN) (2012-2018) in France.

Figure 2 Trends in the proportion of pharmaceutical products on shortage by ATC classes (2012-2018)

Figure 3 Trends in the proportion of pharmaceutical products on shortage by duration of marketing authorization grants

Figure 4 Trends in the causes of shortages of pharmaceutical products in 2015-2018

CONFIDENTIAL  
For peer review only



1  
2  
3 **Figure 1 Trends in shortages by numbers of pharmaceutical products and International Nonproprietary**  
4 **Name drugs (INN) (2012-2018) in France.**  
5  
6

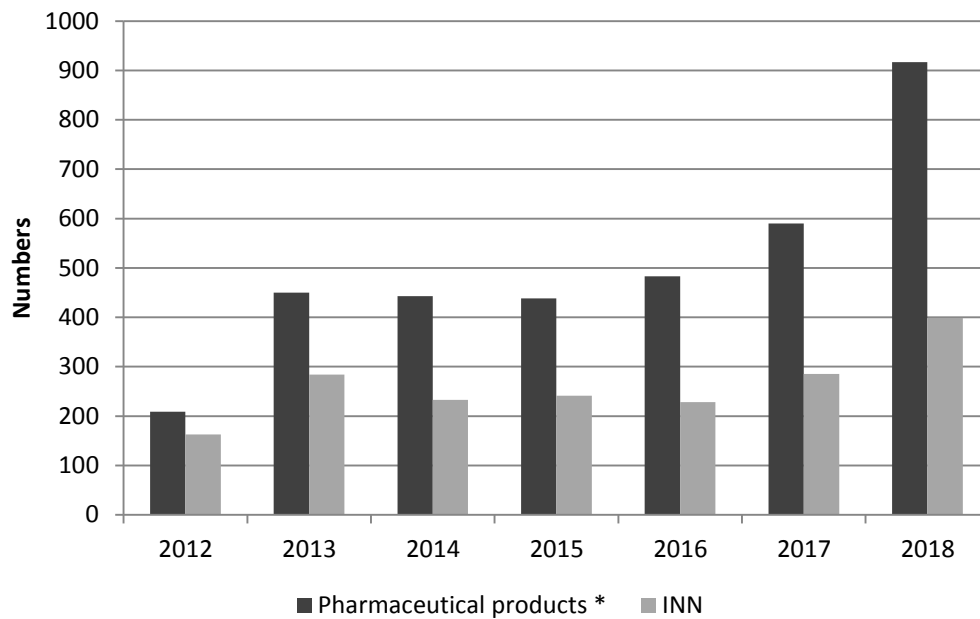

\* **Pharmaceutical products:** defined by a combination of the International Nonproprietary Name (INN), the formulation and the packaging

review only

**Figure 2 Trends in the proportion of pharmaceutical products on shortage by ATC classes (2012-2018)**

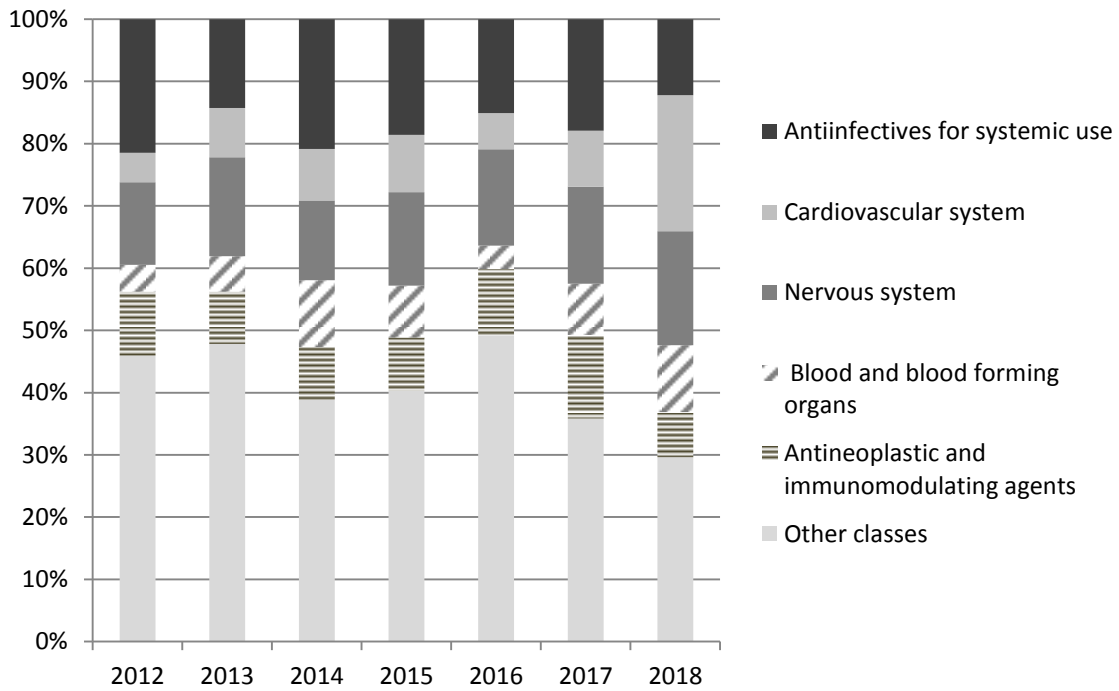

For review only

Figure 3 Trends in the proportion of pharmaceutical products on shortage by duration of marketing authorization grants (2012-2018)

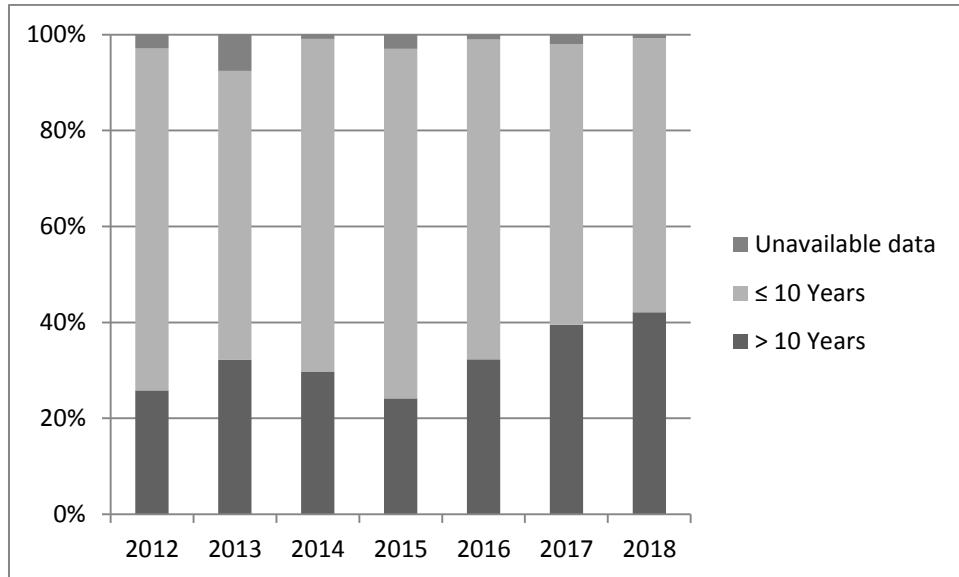

Figure 4 Trends in the causes of shortages of pharmaceutical products in 2015-2018

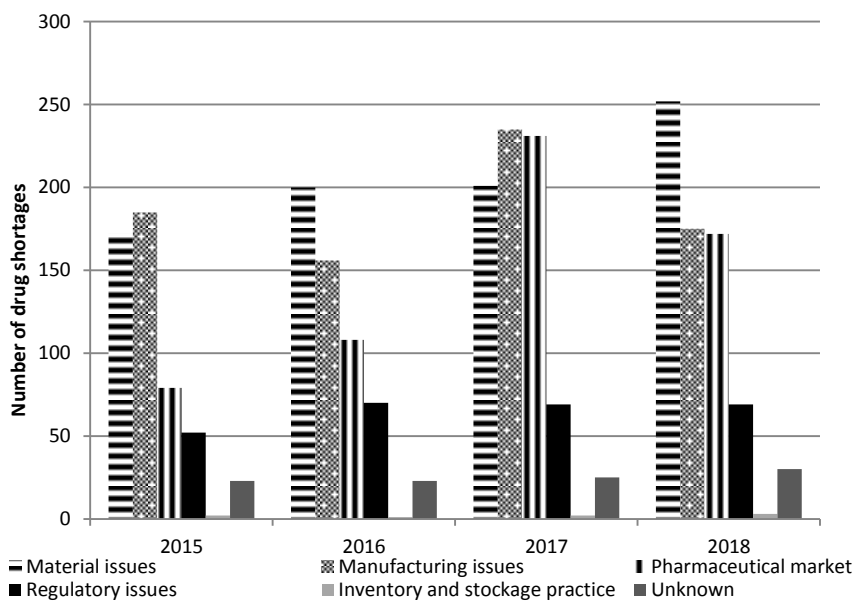

Peer review only

Order of 27 July 2016 fixing the list of therapeutic classes containing major therapeutic of interest drug mentioned in Article L. 5121-31 of the Public Health Code

**A. – ALIMENTARY TRACT AND METABOLISM**

A02 - DRUGS FOR ACID RELATED DISORDERS  
A02B - DRUGS FOR PEPTIC ULCER AND GASTRO-OESOPHAGEAL REFLUX DISEASE (GORD)  
A03 - DRUGS FOR FUNCTIONAL GASTROINTESTINAL DISORDERS  
A03B - BELLADONNA AND DERIVATIVES, PLAIN  
A04 - ANTIEMETICS AND ANTINAUSEANTS  
A04A - ANTIEMETICS AND ANTINAUSEANTS  
A05 - BILE AND LIVER THERAPY  
A05A - BILE THERAPY  
A05B - LIVER THERAPY, LIPOTROPICS  
A06 - DRUGS FOR CONSTIPATION  
A06A - DRUGS FOR CONSTIPATION  
A07 - ANTIDIARRHEALS, INTESTINAL ANTIINFLAMMATORY/ ANTIINFECTIVE AGENTS  
A07A - INTESTINAL ANTIINFECTIVES  
A07E - INTESTINAL ANTIINFLAMMATORY AGENTS  
A10 - DRUGS USED IN DIABETES  
A10A - INSULINS AND ANALOGUES  
A10B - BLOOD GLUCOSE LOWERING DRUGS, EXCL. INSULINS  
A11 - VITAMINS  
A11C - VITAMIN A AND D, INCL. COMBINATIONS OF THE TWO  
A11D - VITAMIN B1, PLAIN AND IN COMBINATION WITH VITAMIN B6 AND B12  
A11H - OTHER PLAIN VITAMIN PREPARATIONS  
A11J - OTHER VITAMIN PRODUCTS, COMBINATIONS  
A12 - MINERAL SUPPLEMENTS  
A12A - CALCIUM  
A12B - POTASSIUM  
A12C - OTHER MINERAL SUPPLEMENTS  
A16 - OTHER ALIMENTARY TRACT AND METABOLISM PRODUCTS  
A16A - OTHER ALIMENTARY TRACT AND METABOLISM PRODUCTS

**B. – BLOOD AND BLOOD FORMING ORGANS**

B01 - ANTITHROMBOTIC AGENTS  
B01A - ANTITHROMBOTIC AGENTS  
B02 - ANTIHEMORRHAGICS  
B02A - ANTIFIBRINOLYTICS  
B02B - VITAMIN K AND OTHER HEMOSTATICS  
B03 - ANTIANEMIC PREPARATIONS  
B03A - IRON PREPARATIONS  
B03B - VITAMIN B12 AND FOLIC ACID  
B03X - OTHER ANTIANEMIC PREPARATIONS  
B05 - BLOOD SUBSTITUTES AND PERFUSION SOLUTIONS  
B05A - BLOOD AND RELATED PRODUCTS

1  
2  
3 B05B - I.V. SOLUTIONS  
4 B05D - PERITONEAL DIALYTICS  
5 B05X - I.V. SOLUTION ADDITIVES  
6 B05Z - HEMODIALYTICS AND HEMOFILTRATES  
7 B06 - OTHER HEMATOLOGICAL AGENTS  
8 B06A - OTHER HEMATOLOGICAL AGENTS  
9  
10

### 11 C. – CARDIOVASCULAR SYSTEM

12  
13  
14 C01 - CARDIAC THERAPY  
15 C01A - CARDIAC GLYCOSIDES  
16 C01B - ANTIARRHYTHMICS, CLASS I AND III  
17 C01C - CARDIAC STIMULANTS EXCL. CARDIAC GLYCOSIDES  
18 C01D - VASODILATORS USED IN CARDIAC DISEASES  
19 C01E - OTHER CARDIAC PREPARATIONS  
20 C02 - ANTIHYPERTENSIVES  
21 C02A - ANTIADRENERGIC AGENTS, CENTRALLY ACTING  
22 C02B - ANTIADRENERGIC AGENTS, GANGLION-BLOCKING  
23 C02C - ANTIADRENERGIC AGENTS, PERIPHERALLY ACTING  
24 C02D - ARTERIOLAR SMOOTH MUSCLE, AGENTS ACTING ON  
25 C02K - OTHER ANTIHYPERTENSIVES  
26 C02L - ANTIHYPERTENSIVES AND DIURETICS IN COMBINATION  
27 C02N - COMBINATIONS OF ANTIHYPERTENSIVES IN ATC-GR. C02  
28 C03 - DIURETICS  
29 C03A - LOW-CEILING DIURETICS, THIAZIDES  
30 C03B - LOW-CEILING DIURETICS, EXCL. THIAZIDES  
31 C03C - HIGH-CEILING DIURETICS  
32 C03D - POTASSIUM-SPARING AGENTS  
33 C03E - DIURETICS AND POTASSIUM-SPARING AGENTS IN COMBINATION  
34 C03X - OTHER DIURETICS  
35 C07 - BETA BLOCKING AGENTS  
36 C07A - BETA BLOCKING AGENTS  
37 C07B - BETA BLOCKING AGENTS AND THIAZIDES  
38 C07C - BETA BLOCKING AGENTS AND OTHER DIURETICS  
39 C07D - BETA BLOCKING AGENTS, THIAZIDES AND OTHER DIURETICS  
40 C07E - BETA BLOCKING AGENTS AND VASODILATORS  
41 C07F - BETA BLOCKING AGENTS AND OTHER ANTIHYPERTENSIVES  
42 C08 - CALCIUM CHANNEL BLOCKERS  
43 C08C - SELECTIVE CALCIUM CHANNEL BLOCKERS WITH MAINLY VASCULAR EFFECTS  
44 C08D - SELECTIVE CALCIUM CHANNEL BLOCKERS WITH DIRECT CARDIAC EFFECTS  
45 C08E - NON-SELECTIVE CALCIUM CHANNEL BLOCKERS  
46  
47  
48  
49 C08G - CALCIUM CHANNEL BLOCKERS AND DIURETICS  
50 C09 - AGENTS ACTING ON THE RENIN-ANGIOTENSIN SYSTEM  
51 C09A - ACE INHIBITORS, PLAIN  
52 C09B - ACE INHIBITORS, COMBINATIONS  
53 C09C - ANGIOTENSIN II ANTAGONISTS, PLAIN  
54  
55  
56  
57  
58  
59  
60

1  
2  
3 C09D - ANGIOTENSIN II ANTAGONISTS, COMBINATIONS  
4 C09X - OTHER AGENTS ACTING ON THE RENIN-ANGIOTENSIN SYSTEM  
5 C010 - LIPID MODIFYING AGENTS  
6 C10A - LIPID MODIFYING AGENTS, PLAIN  
7

8  
9 **D. – DERMATOLOGICALS**

10  
11 D01 - ANTIFUNGALS FOR DERMATOLOGICAL USE  
12 D01A - ANTIFUNGALS FOR TOPICAL USE  
13 D01B - ANTIFUNGALS FOR SYSTEMIC USE  
14 D03 - PREPARATIONS FOR TREATMENT OF WOUNDS AND ULCERS  
15 D03B - ENZYMES  
16 D05 - ANTIPSORIATICS  
17 D05A - ANTIPSORIATICS FOR TOPICAL USE  
18 D05B - ANTIPSORIATICS FOR SYSTEMIC USE  
19 D06 - ANTIBIOTICS AND CHEMOTHERAPEUTICS FOR DERMATOLOGICAL USE  
20 D07 - CORTICOSTEROIDS, DERMATOLOGICAL PREPARATIONS  
21 D07A - CORTICOSTEROIDS, PLAIN  
22 D08 - ANTISEPTICS AND DISINFECTANTS  
23 D08A - ANTISEPTICS AND DISINFECTANTS  
24 D11 - OTHER DERMATOLOGICAL PREPARATIONS  
25 D11A - OTHER DERMATOLOGICAL PREPARATIONS  
26  
27  
28  
29

30  
31 **G. – GENITO URINARY SYSTEM AND SEX HORMONES**

32  
33 G01 - GYNECOLOGICAL ANTIINFECTIVES AND ANTISEPTICS  
34 G02 - OTHER GYNECOLOGICALS  
35 G02A - OXYTOCICS  
36 G02B - CONTRACEPTIVES FOR TOPICAL USE  
37 G02C - OTHER GYNECOLOGICALS  
38 G03 - SEX HORMONES AND MODULATORS OF THE GENITAL SYSTEM  
39 G03A - HORMONAL CONTRACEPTIVES FOR SYSTEMIC USE  
40 G03B - ANDROGENS  
41 G03C - ESTROGENS  
42 G03D - PROGESTOGENS  
43 G03G - GONADOTROPINS AND OTHER OVULATION STIMULANTS  
44 G03H - ANTIANDROGENS  
45 G03X - OTHER SEX HORMONES AND MODULATORS OF THE GENITAL SYSTEM  
46  
47  
48  
49

50  
51 **H. – SYSTEMIC HORMONAL PREPARATIONS, EXCL. SEX HORMONES AND INSULINS**

52  
53 H01 - PITUITARY AND HYPOTHALAMIC HORMONES AND ANALOGUES  
54 H01A - ANTERIOR PITUITARY LOBE HORMONES AND ANALOGUES  
55 H01B - POSTERIOR PITUITARY LOBE HORMONES  
56 H01C - HYPOTHALAMIC HORMONES  
57 H02 - CORTICOSTEROIDS FOR SYSTEMIC USE  
58 H02A - CORTICOSTEROIDS FOR SYSTEMIC USE, PLAIN  
59 H02C - ANTIADRENAL PREPARATIONS  
60

1  
2  
3 H03 - THYROID THERAPY  
4 H03A - THYROID PREPARATIONS  
5 H03B - ANTITHYROID PREPARATIONS  
6 H03C - IODINE THERAPY  
7  
8 H04 - PANCREATIC HORMONES  
9 H04A - GLYCOGENOLYTIC HORMONES  
10 H05 - CALCIUM HOMEOSTASIS  
11 H05A - PARATHYROID HORMONES AND ANALOGUES  
12 H05B - ANTI-PARATHYROID AGENTS  
13  
14

#### 15 **J. – ANTIINFECTIVES FOR SYSTEMIC USE**

16  
17 J01 - ANTIBACTERIALS FOR SYSTEMIC USE  
18 J01A - TETRACYCLINES  
19 J01B - AMPHENICOLS  
20 J01C - BETA-LACTAM ANTIBACTERIALS, PENICILLINS  
21 J01D - OTHER BETA-LACTAM ANTIBACTERIALS  
22 J01E - SULFONAMIDES AND TRIMETHOPRIM  
23 J01F - MACROLIDES, LINCOSAMIDES AND STREPTOGRAMINS  
24 J01G - AMINOGLYCOSIDE ANTIBACTERIALS  
25 J01M - QUINOLONE ANTIBACTERIALS  
26 J01R - COMBINATIONS OF ANTIBACTERIALS  
27 J01X - OTHER ANTIBACTERIALS  
28 J02 - ANTIMYCOTICS FOR SYSTEMIC USE  
29 J02A - ANTIMYCOTICS FOR SYSTEMIC USE  
30 J04 - ANTIMYCOBACTERIALS  
31 J04A - DRUGS FOR TREATMENT OF TUBERCULOSIS  
32 J04B - DRUGS FOR TREATMENT OF LEPROSY  
33 J05 - ANTIVIRALS FOR SYSTEMIC USE  
34 J05A - DIRECT ACTING ANTIVIRALS  
35 J06 - IMMUNE SERA AND IMMUNOGLOBULINS  
36 J06A - IMMUNE SERA  
37 J06B - IMMUNOGLOBULINS  
38 J07 - VACCINES  
39 J07A - BACTERIAL VACCINES  
40 J07B - VIRAL VACCINES  
41 J07C - BACTERIAL AND VIRAL VACCINES, COMBINED  
42  
43  
44  
45  
46  
47  
48

#### 49 **L. – ANTINEOPLASTIC AND IMMUNOMODULATING AGENTS**

50  
51 L01 - ANTINEOPLASTIC AGENTS  
52 L01A - ALKYLATING AGENTS  
53 L01B - ANTIMETABOLITES  
54 L01C - PLANT ALKALOIDS AND OTHER NATURAL PRODUCTS  
55 L01D - CYTOTOXIC ANTIBIOTICS AND RELATED SUBSTANCES  
56 L01X - OTHER ANTINEOPLASTIC AGENTS  
57 L02 - ENDOCRINE THERAPY  
58 L02A - HORMONES AND RELATED AGENTS  
59  
60



1  
2  
3 L02B - HORMONE ANTAGONISTS AND RELATED AGENTS

4 L03 - IMMUNOSTIMULANTS

5 L03A - IMMUNOSTIMULANTS

6 L04 - IMMUNOSUPPRESSANTS

7 L04A - IMMUNOSUPPRESSANTS

8  
9  
10 **M. – MUSCULO-SKELETAL SYSTEM**

11  
12 M03 - MUSCLE RELAXANTS

13 M03A - MUSCLE RELAXANTS, PERIPHERALLY ACTING AGENTS

14 M03B - MUSCLE RELAXANTS, CENTRALLY ACTING AGENTS

15 M03C - MUSCLE RELAXANTS, DIRECTLY ACTING AGENTS

16 M04 - ANTIGOUT PREPARATIONS

17 M04A - ANTIGOUT PREPARATIONS

18 M05 - DRUGS FOR TREATMENT OF BONE DISEASES

19 M05B - DRUGS AFFECTING BONE STRUCTURE AND MINERALIZATION

20  
21  
22  
23  
24  
25 **N. – NERVOUS SYSTEM**

26 N01 - ANESTHETICS

27 N01A - ANESTHETICS, GENERAL

28 N01B - ANESTHETICS, LOCAL

29 N02 - ANALGESICS

30 N02A - OPIOIDS

31 N02B - OTHER ANALGESICS AND ANTIPYRETICS

32 N03 - ANTIEPILEPTICS

33 N03A - ANTIEPILEPTICS

34 N04 - ANTI-PARKINSON DRUGS

35 N04A - ANTICHOLINERGIC AGENTS

36 N04B - DOPAMINERGIC AGENTS

37 N05 - PSYCHOLEPTICS

38 N05A - ANTIPSYCHOTICS

39 N05B - ANXIOLYTICS

40 N06 - PSYCHOANALEPTICS

41 N06A - ANTIDEPRESSANTS

42 N06B - PSYCHOSTIMULANTS, AGENTS USED FOR ADHD AND NOOTROPICS

43 N06D - ANTI-DEMENTIA DRUGS

44 N07 - OTHER NERVOUS SYSTEM DRUGS

45 N07A - PARASYMPATHOMIMETICS

46 N07B - DRUGS USED IN ADDICTIVE DISORDERS

47 N07X - OTHER NERVOUS SYSTEM DRUGS

48  
49  
50  
51  
52  
53  
54  
55  
56 **P. – ANTIPARASITIC PRODUCTS, INSECTICIDES, AND REPELLENTS**

57 P01 - ANTIPROTOZOALS

58 P01A - AGENTS AGAINST AMOEBIASIS AND OTHER PROTOZOAL DISEASES

1  
2  
3 P01B - ANTIMALARIALS  
4 P01C - AGENTS AGAINST LEISHMANIASIS AND TRYPANOSOMIASIS  
5 P02 - ANTHELMINTICS  
6 P02B - ANTITREMATODALS  
7 P02C - ANTINEMATODAL AGENTS  
8 P02D - ANTICESTODALS  
9  
10 P03 - ECTOPARASITICIDES, INCL. SCABICIDES, INSECTICIDES AND REPELLENTS  
11 P03A - ECTOPARASITICIDES, INCL. SCABICIDES  
12  
13

#### 14 **R. – RESPIRATORY SYSTEM**

15

16 R03 - DRUGS FOR OBSTRUCTIVE AIRWAY DISEASES  
17 R03A - ADRENERGICS, INHALANTS  
18 R03B - OTHER DRUGS FOR OBSTRUCTIVE AIRWAY DISEASES, INHALANTS  
19 R03C - ADRENERGICS FOR SYSTEMIC USE  
20 R03D - OTHER SYSTEMIC DRUGS FOR OBSTRUCTIVE AIRWAY DISEASES  
21 R06 - ANTIHISTAMINES FOR SYSTEMIC USE  
22 R06A - ANTIHISTAMINES FOR SYSTEMIC USE  
23 R07 - OTHER RESPIRATORY SYSTEM PRODUCTS  
24 R07A - OTHER RESPIRATORY SYSTEM PRODUCTS  
25  
26  
27

#### 28 **S. – SENSORY ORGANS**

29

30  
31 S01 - OPHTHALMOLOGICALS  
32 S01A - ANTIINFECTIVES  
33 S01B - ANTIINFLAMMATORY AGENTS  
34 S01E - ANTIGLAUCOMA PREPARATIONS AND MIOTICS  
35 S01F - MYDRIATICS AND CYCLOPLEGICS  
36 S01H - LOCAL ANESTHETICS  
37 S01J - DIAGNOSTIC AGENTS  
38 S01L - DRUGS AGAINST OCULO-VASCULAR DISORDERS  
39 S01X - OTHER OPHTHALMOLOGICALS  
40  
41 S02 - OTOLOGICALS  
42 S02A - ANTIINFECTIVES  
43 S02B - CORTICOSTEROIDS  
44  
45

#### 46 **V. - VARIOUS**

47

48  
49 V01 - ALLERGENS  
50 V01A - ALLERGENS  
51 V03 - ALL OTHER THERAPEUTIC PRODUCTS  
52 V03A - ALL OTHER THERAPEUTIC PRODUCTS  
53 V04 - DIAGNOSTIC AGENTS  
54 V04C - OTHER DIAGNOSTIC AGENTS  
55 V08 - CONTRAST MEDIA  
56 V08A - X-RAY CONTRAST MEDIA, IODINATED  
57 V08B - X-RAY CONTRAST MEDIA, NON-IODINATED  
58 V08C - MAGNETIC RESONANCE IMAGING CONTRAST MEDIA  
59  
60

1  
2  
3 V08D - ULTRASOUND CONTRAST MEDIA  
4 V09 - DIAGNOSTIC RADIOPHARMACEUTICALS  
5 V09A - CENTRAL NERVOUS SYSTEM  
6 V09B - SKELETON  
7 V09C - RENAL SYSTEM  
8 V09D - HEPATIC AND RETICULO ENDOTHELIAL SYSTEM  
9 V09E - RESPIRATORY SYSTEM  
10 V09F - THYROID  
11 V09G - CARDIOVASCULAR SYSTEM  
12 V09H - INFLAMMATION AND INFECTION DETECTION  
13 V09I - TUMOUR DETECTION  
14 V09X - OTHER DIAGNOSTIC RADIOPHARMACEUTICALS  
15 V10 - THERAPEUTIC RADIOPHARMACEUTICALS  
16 V10A - ANTIINFLAMMATORY AGENTS  
17 V10B - PAIN PALLIATION (BONE SEEKING AGENTS)  
18 V10X - OTHER THERAPEUTIC RADIOPHARMACEUTICALS  
19  
20  
21  
22  
23  
24  
25  
26  
27  
28  
29  
30  
31  
32  
33  
34  
35  
36  
37  
38  
39  
40  
41  
42  
43  
44  
45  
46  
47  
48  
49  
50  
51  
52  
53  
54  
55  
56  
57  
58  
59  
60

peer review only

**STROBE Statement**—Checklist of items that should be included in reports of *cross-sectional studies*

## The French reporting system for drug shortages: description and trends from 2012 to 2018. An observational retrospective study

|                          | Item No | Recommendation                                                                                                                                                                                 |    | Page number    |
|--------------------------|---------|------------------------------------------------------------------------------------------------------------------------------------------------------------------------------------------------|----|----------------|
| Title and abstract       | 1       | (a) Indicate the study's design with a commonly used term in the title or the abstract                                                                                                         | OK | 2 of 45        |
|                          |         | (b) Provide in the abstract an informative and balanced summary of what was done and what was found                                                                                            | OK | 2 of 45        |
| <b>Introduction</b>      |         |                                                                                                                                                                                                |    |                |
| Background/rationale     | 2       | Explain the scientific background and rationale for the investigation being reported                                                                                                           | OK | 4 of 45        |
| Objectives               | 3       | State specific objectives, including any prespecified hypotheses                                                                                                                               | OK | 4 & 5 of 45    |
| <b>Methods</b>           |         |                                                                                                                                                                                                |    |                |
| Study design             | 4       | Present key elements of study design early in the paper                                                                                                                                        | OK | 5 of 45        |
| Setting                  | 5       | Describe the setting, locations, and relevant dates, including periods of recruitment, exposure, follow-up, and data collection                                                                | OK | 5 of 45        |
| Participants             | 6       | (a) Give the eligibility criteria, and the sources and methods of selection                                                                                                                    | OK | 5&6 of 45      |
| Variables                | 7       | Clearly define all outcomes                                                                                                                                                                    | OK | 5&6 of 45      |
| Data sources/measurement | 8*      | For each variable of interest, give sources of data and details of methods of assessment (measurement).                                                                                        | OK | 5&6 of 45      |
| Bias                     | 9       | Describe any efforts to address potential sources of bias                                                                                                                                      | OK | 6 of 45        |
| Study size               | 10      | Explain how the study size was arrived at                                                                                                                                                      | OK | 5&6 of 45      |
| Quantitative variables   | 11      | Explain how quantitative variables were handled in the analyses. If applicable, describe which groupings were chosen and why                                                                   | OK | 5&6 of 45      |
| Statistical methods      | 12      | (a) Describe all statistical methods, including those used to control for confounding                                                                                                          | OK | 5&6 of 45      |
|                          |         | (b) Describe any methods used to examine subgroups and interactions                                                                                                                            | OK | 5&6 of 45      |
|                          |         | (c) Explain how missing data were addressed                                                                                                                                                    | OK | 6 of 45        |
|                          |         | (d) If applicable, describe analytical methods taking account of sampling strategy                                                                                                             | NA | NA             |
|                          |         | (e) Describe any sensitivity analyses                                                                                                                                                          | NA | NA             |
| <b>Results</b>           |         |                                                                                                                                                                                                |    |                |
| Participants             | 13*     | (a) Report numbers of products at each stage of study—eg numbers potentially eligible, examined for eligibility, confirmed eligible, included in the study, completing follow-up, and analysed | OK | 6,7 & 15 of 45 |
|                          |         | (b) Give reasons for non-participation at each stage                                                                                                                                           | NA | NA             |
|                          |         | (c) Consider use of a flow diagram                                                                                                                                                             | NA | NA             |
| Descriptive data         | 14*     | (a) Give characteristics of study participants (eg demographic,                                                                                                                                | NA | NA             |

|                          |     |                                                                                                                                                                                                              |    |                |
|--------------------------|-----|--------------------------------------------------------------------------------------------------------------------------------------------------------------------------------------------------------------|----|----------------|
|                          |     | clinical, social) and information on exposures and potential confounders                                                                                                                                     |    |                |
|                          |     | (b) Indicate number of products with missing data for each variable of interest                                                                                                                              | OK | 15 of 45       |
| Outcome data             | 15* | Report numbers of outcome events or summary measures                                                                                                                                                         | NA | NA             |
| Main results             | 16  | (a) Give unadjusted estimates and, if applicable, confounder-adjusted estimates and their precision (eg, 95% confidence interval). Make clear which confounders were adjusted for and why they were included | NA | NA             |
|                          |     | (b) Report category boundaries when continuous variables were categorized                                                                                                                                    | NA | NA             |
|                          |     | (c) If relevant, consider translating estimates of relative risk into absolute risk for a meaningful time period                                                                                             | NA | NA             |
| Other analyses           | 17  | Report other analyses done—eg analyses of subgroups and interactions, and sensitivity analyses                                                                                                               | OK | 17 to 20 of 45 |
| <b>Discussion</b>        |     |                                                                                                                                                                                                              |    |                |
| Key results              | 18  | Summarise key results with reference to study objectives                                                                                                                                                     | OK | 8 of 45        |
| Limitations              | 19  | Discuss limitations of the study, taking into account sources of potential bias or imprecision. Discuss both direction and magnitude of any potential bias                                                   | OK | 10 of 45       |
| Interpretation           | 20  | Give a cautious overall interpretation of results considering objectives, limitations, multiplicity of analyses, results from similar studies, and other relevant evidence                                   | OK | 9&10 of 45     |
| Generalisability         | 21  | Discuss the generalisability (external validity) of the study results                                                                                                                                        | OK | 10 of 45       |
| <b>Other information</b> |     |                                                                                                                                                                                                              |    |                |
| Funding                  | 22  | Give the source of funding and the role of the funders for the present study and, if applicable, for the original study on which the present article is based                                                | OK | 12 of 45       |

\*Give information separately for exposed and unexposed groups.

**Note:** An Explanation and Elaboration article discusses each checklist item and gives methodological background and published examples of transparent reporting. The STROBE checklist is best used in conjunction with this article (freely available on the Web sites of PLoS Medicine at <http://www.plosmedicine.org/>, Annals of Internal Medicine at <http://www.annals.org/>, and Epidemiology at <http://www.epidem.com/>). Information on the STROBE Initiative is available at [www.strobe-statement.org](http://www.strobe-statement.org).

# BMJ Open

## The French reporting system for drug shortages: description and trends from 2012 to 2018. An observational retrospective study

|                                 |                                                                                                                                                                                                                                                                                                         |
|---------------------------------|---------------------------------------------------------------------------------------------------------------------------------------------------------------------------------------------------------------------------------------------------------------------------------------------------------|
| Journal:                        | <i>BMJ Open</i>                                                                                                                                                                                                                                                                                         |
| Manuscript ID                   | bmjopen-2019-034033.R2                                                                                                                                                                                                                                                                                  |
| Article Type:                   | Original research                                                                                                                                                                                                                                                                                       |
| Date Submitted by the Author:   | 02-Jan-2020                                                                                                                                                                                                                                                                                             |
| Complete List of Authors:       | Benhabib, Amine; French Health Products Safety Agency; University of Strasbourg Faculty of Pharmacy<br>Ioughlissen, Saïd; French Health Products Safety Agency<br>Ratignier-Carbonneil, Christelle; French Health Products Safety Agency<br>MAISON, Patrick; French Health Products Safety Agency; CHIC |
| <b>Primary Subject Heading</b>: | Public health                                                                                                                                                                                                                                                                                           |
| Secondary Subject Heading:      | Health policy, Global health                                                                                                                                                                                                                                                                            |
| Keywords:                       | Drug shortages, supply of medicines, short supply, major therapeutic interest, pharmacosurveillance, France                                                                                                                                                                                             |
|                                 |                                                                                                                                                                                                                                                                                                         |

SCHOLARONE™  
Manuscripts

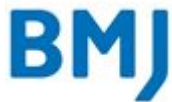

I, the Submitting Author has the right to grant and does grant on behalf of all authors of the Work (as defined in the below author licence), an exclusive licence and/or a non-exclusive licence for contributions from authors who are: i) UK Crown employees; ii) where BMJ has agreed a CC-BY licence shall apply, and/or iii) in accordance with the terms applicable for US Federal Government officers or employees acting as part of their official duties; on a worldwide, perpetual, irrevocable, royalty-free basis to BMJ Publishing Group Ltd ("BMJ") its licensees and where the relevant Journal is co-owned by BMJ to the co-owners of the Journal, to publish the Work in this journal and any other BMJ products and to exploit all rights, as set out in our [licence](#).

The Submitting Author accepts and understands that any supply made under these terms is made by BMJ to the Submitting Author unless you are acting as an employee on behalf of your employer or a postgraduate student of an affiliated institution which is paying any applicable article publishing charge ("APC") for Open Access articles. Where the Submitting Author wishes to make the Work available on an Open Access basis (and intends to pay the relevant APC), the terms of reuse of such Open Access shall be governed by a Creative Commons licence – details of these licences and which [Creative Commons](#) licence will apply to this Work are set out in our licence referred to above.

Other than as permitted in any relevant BMJ Author's Self Archiving Policies, I confirm this Work has not been accepted for publication elsewhere, is not being considered for publication elsewhere and does not duplicate material already published. I confirm all authors consent to publication of this Work and authorise the granting of this licence.

1  
2  
3 **The French reporting system for drug shortages: description and trends from 2012 to 2018.**  
4 **An observational retrospective study**  
5  
6  
7  
8  
9  
10

11 Amine Benhabib,<sup>1, 2</sup> Said Ioughlissen, <sup>1</sup> Christelle Ratignier-Carbonneil, <sup>1</sup> Patrick Maison<sup>1, 3</sup>  
12  
13

14  
15 <sup>1</sup> French National Agency for Medicines and Health Products Safety (ANSM), Saint-Denis, France  
16

17 <sup>2</sup> Strasbourg Faculty of Pharmacy, Illkirch-Graffenstaden, France  
18

19 <sup>3</sup> EA 7379, Paris Est Creteil University (UPEC) and CHIC Hospital, Créteil, France  
20  
21  
22  
23

24 Correspondance to: Patrick Maison, Agence Nationale de Sécurité des Médicaments et des Produits  
25 de Santé, 143-147 bd, Anatole France, F-93285 Saint-Denis Cedex ; Tel +331 55 87 35 23 ; Fax +331  
26 55 87 35 23 ; Email : patrick.maison@ansm.sante.fr  
27  
28  
29  
30

31 **Running head:** The French reporting system for drug shortages  
32  
33

34  
35 **Keywords:** Drug shortages, supply of medicines, short supply, major therapeutic interest,  
36 pharmacosurveillance, France, national reporting system  
37  
38  
39  
40

41 **Word count:** *(excluding the abstract, references, tables, boxes, or figures): 3288*  
42  
43  
44

45 **Numbers of tables and figures:** 5  
46  
47  
48  
49  
50  
51  
52  
53  
54  
55  
56  
57  
58  
59  
60



## ABSTRACT

### Objectives

The aim was to provide figures for drug shortages in France and describe their characteristics, causes, and trends between 2012 and 2018.

### Methods

Data from the national reporting system from the Agency of Medicine and Health Product Safety (ANSM) was analyzed. This database contains information regarding effective and predicted shortages of major therapeutic of interest (MTI) drugs (*i.e.* drugs whose shortage would be life-threatening or representing a loss of treatment opportunity for patients with a severe disease) which are mandatory reported by marketing authorization holders to the ANSM. Data are presented as numbers or percentages of pharmaceutical products (*i.e.* the product name and its formulation) reported on shortage between 2012 and 2018.

### Results

There were 3530 pharmaceutical products reported on shortage during the period, including 1833 different active substances. Drugs on shortage were mostly old products (63.4%) with national marketing authorization procedures (62.8%), as well as injectable and oral forms (47.5% and 43.3%, respectively). Antiinfectives for systemic use ranked first (18%), followed by nervous and cardiovascular system drugs and by antineoplastic and immunomodulating agents (respectively 17.4%, 12.5% and 10.4%). The number of reported shortages presented a 4-fold increase between 2012 and 2018 and a sharp rise in 2017&2018, along with a rise in the number of active substances on shortage. The therapeutic classes concerned remained similar over time. Manufacturing and material supply issues were the main reported reasons for the shortage each year (30%) and there was an overall rise of pharmaceutical market reasons.

### Conclusion

Drug shortages were increasingly reported in France. Preventive measures should specifically target the products the most on shortage, in particular old drugs, injectable, antiinfective, nervous system and cardiovascular system drugs as well as antineoplastic and immunomodulating agents.

### Strengths and Limitations

- This is the first study to describe and analyse drug shortages in France using a national reporting system over a 7 years period, from 2012 to 2018.
- A drug shortage is according to pharmaceutical company's perspective and reflects the inability of a pharmaceutical company to produce a drug for national needs, whereas a short supply is according to patient's perspective and defines a the unavailability of a drug in a pharmacies.
- Trends of drug shortages were described according to both pharmaceutical products (defined as a combination of the active substance, the formulation and the packaging) and International Nonproprietary Name drugs, allowing a more detailed description and interpretation of drug shortages and their causes.
- Drug shortages were defined as both effective and predicted shortages of Major Therapeutic of Interest (MTI) drugs, which may not allow generalization to all drugs.
- Reporting predictive and effective shortages to ANSM will indeed be cases where the risk of shortage will not become a short supply, but these situations reflect a production problem and may lead to short supply.

## INTRODUCTION

Drug shortages are a major public health threat worldwide occurring in all therapeutic classes.<sup>1-7</sup> According to the WHO, a drug shortage is defined as an insufficiency in the supply of medicines, health products and vaccines that are identified by the health system as essential to meet public health and patient need.<sup>8</sup> Drug shortages can have detrimental effects on patients care as they may result in delayed treatment or switches into alternative therapies, therefore leading to disease progression, increased risk of adverse effects or medication errors as well as rising healthcare costs.<sup>9-11</sup> Multiple reasons, such as manufacturing issues, regulatory issues or economic factors, in addition to increased global demand have been suggested to underlie drug shortages.<sup>1, 3, 12, 13</sup>

In France, the management of drug shortages and short supply was first regulated in 2012 with a decree dated September 28<sup>th</sup>, 2012 on the supply of human drugs.<sup>14</sup> This decree requires the pharmaceutical operators commercializing drugs in France to ensure an appropriate and continuous supply of wholesalers and hospitals within 72 hours. Marketing authorization holders were thus mandated to notify the French National Agency of Medicine and Health Product Safety (*Agence Nationale de Sécurité du Médicament et des produits de santé* – ANSM) of any effective or predicted drug shortages, specifying the available stocks, the estimated period of shortage, the deadline for the availability of the product, as well as the substitute drugs. In 2016, the French health law of January 26<sup>th</sup> and its decree of July 20<sup>th</sup> targeted the shortages of drugs of major therapeutic of interest (MTI) defined as drugs for which unavailability would be life-threatening or represent a loss of treatment opportunity.<sup>15</sup> The list of the therapeutic classes of MTI drugs was provided by the ministerial order of July 27<sup>th</sup>(Supplementary materials).<sup>16</sup> This definition relates to some ATC classes and thus comprises all drugs from the same therapeutic class, whether they are generics or brand names. The shortage of an MTI drug has to be reported by the marketing authorization holder (MAH) to the ANSM even when another competing equivalent MTI drug is available. MAH are not aware of the productions capacities of other MAHs and thus of the availability of equivalent MIT drugs at the time of the report. The impact of a shortage in terms of public health and production is then estimated by the ANSM. The decree of July 20<sup>th</sup> also warranted new regulatory tools in order to reinforce the legal obligations of pharmaceutical companies and wholesalers. Marketing authorization holders and operators were required to develop shortage management plans (*Plan de Gestion des Pénuries* – PGP), and wholesalers were not allowed to export MTI drugs that are on effective or predicted shortage. Responsibilities of pharmaceutical operators were also strengthened by the implementation of administrative or financial penalties in case of non-compliance.<sup>15, 17</sup>

1  
2  
3 According to a survey conducted in 2014, drug shortages were increasingly reported in Europe and  
4 occurred daily or weekly.<sup>3</sup> While the issue of drug shortages has been widely studied in the USA,<sup>18-21</sup>  
5 figures in Europe are scarce and national trends of drug shortages are not available.<sup>22</sup> The  
6 identification and surveillance of the most frequent drugs on shortage and the analysis of their  
7 causes may allow implementing targeted preventive measures in order to limit the negative impacts  
8 on patient care. The present study therefore aimed to describe the characteristics and trends of  
9 reported shortages of MTI drugs in France using the national reporting system from the Agency of  
10 Medicine and Health Product Safety (ANSM).  
11  
12  
13  
14  
15  
16  
17  
18  
19

## 20 **METHODS**

21  
22  
23  
24  
25 This observational retrospective study analyzed the surveillance reporting system of drug shortages  
26 from the French National Agency of Medicine and Health Product Safety (ANSM) between 2012 and  
27 2018. Since 2012, marketing authorization holders are indeed obliged to declare any effective or  
28 predicted shortage of MTI drugs to the ANSM. The reporting database contains the information  
29 reported by the marketing authorization holders via completed declaration forms. The following data  
30 were analyzed: (1) from declaration forms: dates of report, drugs names, active substances  
31 (International Nonproprietary Names (INN)), routes of administration, setting first impacted by the  
32 shortage (community pharmacy and/or hospital), reasons for the shortages (available since 2015); (2)  
33 from the marketing authorization dossier and the summary of the product characteristics: dates and  
34 procedures of marketing authorization grants, storage conditions; and (3) ATC codes according to the  
35 WHO Collaborating Centre for Drug Statistics Methodology.<sup>23</sup>  
36  
37  
38  
39  
40  
41  
42  
43

44 Marketing authorization holders (MAH) shall follow the manufacturing circuit of its drugs, and  
45 reporting to the ANSM is required for each dysfunction that may result in effective or predictive  
46 shortages. A drug shortage reflects the inability of a pharmaceutical company to produce a drug and  
47 maintain its marketing at a national level, whereas the short supply defines the unavailability of a  
48 drug in pharmacies. In addition, a short supply assesses the sanitary risk in the scope of the pharmacy  
49 practice whereas drug shortages highlight issues in pharmaceutical production. According to these  
50 definitions of drug shortages, short supply was not considered in present study.  
51  
52  
53  
54  
55

56 Reports of drug shortage were therefore defined as both effective and predicted shortages of MTI  
57 drugs recorded by the ANSM each year.  
58  
59  
60

1  
2  
3 Duration of the marketing authorization grant was defined as the difference between the years of  
4 the shortage reports and the year when the marketing authorization was granted.  
5

6  
7 Causes of shortages were categorized into: (1) manufacturing issues, including the stage of  
8 manufacturing or packaging of the final product ; (2) material issues, *i.e.*, defect in raw materials,  
9 excipients, packaging and semi-finished or bulk pharmaceuticals ; (3) pharmaceutical market, *i.e.*,  
10 related to the difficulty of the operator to purchase products, including insufficient production  
11 capacity ; (4) regulatory issues, *i.e.*, new regulation directly related to the delayed marketing ; and (5)  
12 inventory and storage practices, *i.e.*, stock errors or inappropriate management of expiry date.  
13  
14  
15  
16

17  
18 Data were presented in numbers or in percentages of pharmaceutical products reported on  
19 shortage. Pharmaceutical products were defined as a combination of the International  
20 Nonproprietary Name (INN), the formulation and the packaging and are identified by the *code*  
21 *identifiant de spécialité* (CIS). Therefore, a shortage of a pharmaceutical product does not necessarily  
22 imply the shortages of all drugs with the same INN.  
23  
24  
25

26  
27 There were no missing data except for marketing authorization procedures and duration of  
28 marketing authorization grants.  
29  
30

### 31 **Patient and public involvement**

32  
33 Patients were not directly involved in the design, planning and conception of this study.  
34  
35  
36  
37  
38

## 39 **RESULTS**

40  
41  
42  
43  
44 Between the years 2012 and 2018, 3530 pharmaceutical products were reported of on shortage,  
45 including 1833 different International Nonproprietary Name (INN) drugs. The overall characteristics  
46 of the pharmaceutical products reported on shortage from 2012 to 2018 are presented in **table 1**.  
47 Drugs with a marketing authorization granted more than 10 years ago (63.4%) and according to a  
48 national procedure (62.8%) were the most concerned. Generics drugs accounted for 34% of  
49 shortages overall and for 17% of old drugs (marketing authorization grant > 10 years). Community  
50 pharmacies and hospitals were similarly first impacted by shortages. Injectable and oral were the  
51 most commonly affected forms (with respectively 47.5% and 43.3%). With regards to ATC classes,  
52 antiinfectives for systemic use ranked first with 18% of total shortage reports, followed by nervous  
53 and cardiovascular system drugs as well as by antineoplastic and immunomodulating agents (with  
54  
55  
56  
57  
58  
59  
60

1  
2  
3 respectively 17.4%, 12.5% and 10.4) (**table 1**). Antibacterial for systemic use and vaccines accounted  
4 for 53% and 19% of antiinfectives shortages, respectively. Antiepileptic, anesthetic and analgesic  
5 products were among the most common nervous system drugs on shortage (22%, 18% and 16%,  
6 respectively). Cephalosporins were the most common antibacterial drug class reported on shortage.  
7  
8  
9

10 Trends in the number of pharmaceutical products and INN drugs reported on shortage were shown  
11 in **figure 1**. There was a 4-fold increase in the total products on shortage between 2012 and 2018, to  
12 reach 917 shortages in 2018. The numbers of INN on shortage were similar in 2013 and 2017 but  
13 presented a 2-fold increase between the years 2012 and 2018, to reach a peak in 2018 (n=399)  
14 (**figure 1**).  
15  
16  
17  
18  
19

20 Injectable and oral forms remained the two main pharmaceutical forms on shortage each year (from  
21 51% to 37% and 40% to 56% between 2012 and 2018 for injectable and oral forms, respectively).  
22  
23

24 All therapeutic classes were reported on shortage each year. **Figure 2** presents the trends in  
25 proportions of shortage of pharmaceutical products by ATC classes from 2012 to 2018. The  
26 distribution of ATC classes reported on shortage was similar over time. Antiinfectives for systemic  
27 use, nervous system drugs as well as antineoplastic and immunomodulating agents ranked among  
28 the first classes on shortage until 2017. Shortages of cardiovascular system drugs were increasingly  
29 reported since 2012 and a sharp rise occurred in 2018 (n=216 reports). Cardiovascular drugs ranked  
30 first in 2018 (24%), explained by products of valsartan accounting for half of shortages. The  
31 proportion of nervous system drugs, antiinfectives and antineoplastic and immunomodulating agents  
32 on shortage was relatively stable over the years (**figure 2**). Yet, a continuous increase of shortages  
33 was observed for nervous system drugs that ranked second in 2018 (n=181 reports) (**figure 2**). In  
34 2018, antiepileptics accounted for the most reported class of nervous system drugs on shortage  
35 (34%), of which 13 were topiramate-based products. There was also a rise in shortages of  
36 antiinfective products in 2017 (n=122), driven in half by antibacterial drugs, in particular  
37 cephalosporins (n=23). Among antiinfectives, antibacterial drugs were the first class reported on  
38 shortage each year between 2012 and 2018, followed by vaccines (data not shown).  
39  
40  
41  
42  
43  
44  
45  
46  
47  
48  
49

50 **Figure 3** presents the trends in the proportion of shortage of pharmaceutical products by duration of  
51 marketing authorization grant from 2012 to 2018. During that period, drugs with an old marketing  
52 authorization grant (of more than 10 years) were the most reported on shortage.  
53  
54

55 Drug shortages first impacting hospital settings accounted for half of the shortages in 2017 and for a  
56 third in other years. Similar trends in the proportion of shortage were observed for settings first  
57 impacted (data not shown).  
58  
59  
60

1  
2  
3 Trends in the reported causes of shortages between 2015 and 2018 are shown in **figure 4**.  
4 Manufacturing and material supply issues were the main reasons each year with approximately 30%  
5 of the shortage share. There was an overall rise of pharmaceutical market reasons.  
6  
7  
8  
9

## 10 11 **DISCUSSION**

12  
13  
14  
15  
16 Based on the French national reporting system, the present study described the characteristics of  
17 MTI drugs reported on shortage in France between 2012 and 2018 as mostly: old drugs, drugs with  
18 national marketing authorization procedures and injectables. Both hospital and community  
19 pharmacies were similarly affected by shortages and one third of them first occurred in hospital  
20 settings. Four therapeutic classes (antiinfectives, nervous system, cardiovascular system drugs,  
21 antineoplastics and immunomodulating agents) remained the most on shortage with the same  
22 distribution over the years. The number of pharmaceutical products reported on shortage increased  
23 by 4-fold between 2012 and 2018, along with a rise in the number of INN drugs. In 2018, the number  
24 of pharmaceutical products on shortage reached a peak, with 399 different active substances from all  
25 therapeutic classes affected by shortage. Compared with the number (n=2 800) of approved and  
26 marketed INN drugs in France in 2016,<sup>24</sup> there were approximately 13% of INN drugs on shortage in  
27 2018 and 60% during the 2012-2018 period.  
28  
29  
30  
31  
32  
33  
34  
35

36  
37 The present rise in drug shortages in France is concomitant with the observed trends in the USA,  
38 reflecting the international public health challenge of drug shortages. According to the University of  
39 Utah Drug Information Service (UUDIS), new drugs on shortage in the USA were found to triple  
40 between 2004 and 2018, although a decrease occurred since 2012.<sup>25</sup> Comparisons of figures between  
41 the two countries are yet limited by differences in definitions of drug shortage<sup>2</sup> as well as differences  
42 in pharmaceutical products, blister packaging being less used in the USA.  
43  
44  
45  
46  
47

48 The four therapeutic classes most impacted by shortages in the present study were antiinfectives for  
49 systemic use, nervous system drugs, cardiovascular drugs and antineoplastic and immunomodulating  
50 agents, in accordance with previous results from a European review finding that these same four  
51 classes represented over 50% of reported shortage.<sup>4</sup> We found that antiinfectives for systemic use  
52 represented the first therapeutic class reported on shortage until 2018 (18%) among which  
53 antibacterial drugs ranked first each year. This trend is well documented across the United States.  
54 Antimicrobials were the most common drug class on shortage in critical care (2001-2016) and  
55 emergency medicine practice (2001-2014), representing respectively 20% and 24% of US shortages.<sup>19</sup>  
56  
57  
58  
59  
60



1  
2  
3 <sup>20</sup> Cephalosporins were the most common antibacterial drug class, in accordance with findings from a  
4 US study using the UUDIS database from 2001 to 2013.<sup>26</sup> Shortages of antimicrobials may not have  
5 alternative production sources and may thus require the use of less effective or more toxic  
6 alternatives,<sup>20, 26</sup> leading to worse patient outcomes.<sup>18</sup> In a European survey, anti-infectives were also  
7 found to be the most common drugs on shortage in hospital pharmacies in 2013, along with cancer  
8 drugs.<sup>22</sup> The burden of cancer drug shortages was previously highlighted in the United States<sup>27, 28</sup> and  
9 more recently in a hospital paediatric hemato-oncology unit in Belgium.<sup>7</sup> A lack of market  
10 attractiveness and low profitability has been suggested as a cause of shortages, due to prompting the  
11 discontinuation of some long-standing or lower-priced products such as antibiotics and oncologic  
12 medicines.<sup>1</sup>

13  
14  
15  
16  
17  
18  
19  
20  
21 In the present study, cardiovascular drugs were one of the first therapeutic classes on shortage and  
22 the first in 2018 (28%). This was driven by shortages of valsartan products resulting from the  
23 detection in 2018 of impurities in the active substance of valsartan-based medicines. As a precaution,  
24 all potentially impacted batches of valsartan containing drugs were recalled in France since July  
25 2018.<sup>29</sup> Shortage of cardiovascular drugs was also common in the USA.<sup>20, 30</sup>

26  
27  
28  
29  
30 In this study, shortages mostly involved injectable products each year. This finding is consistent with  
31 previous surveys in Europe and USA.<sup>4, 20</sup> Injectable products are at increased risk of shortage related  
32 to quality control concerns because of the complexities associated with manufacturing a sterile  
33 product.<sup>2</sup> Oral drugs also accounted for a large share of shortages in our study, reflecting that causes  
34 of drug shortages goes beyond pure manufacturing problems related to technical issues or quality  
35 problems.

36  
37  
38  
39  
40 According to our results, old drugs were the most reported on shortage during the period from year  
41 2012 to year 2018, with 63.4% of drug shortages while there were 45% of old products on the market  
42 in 2018 in France. Age of the marketing authorization is thus likely to be a major determinant of drug  
43 shortage, in accordance with a US study finding that the age of drug was a strong risk factor for  
44 shortage in oncology.<sup>27</sup> According to the authors, this result suggested that policies focused  
45 predominately on promoting increases in distinct suppliers and that competition may not alleviate  
46 drug shortages.

47  
48  
49  
50  
51  
52  
53 The reasons behind drug shortages are complex and many factors may contribute simultaneously. In  
54 France, the increase in drug shortage reports may in part be related to changes in the regulations.  
55 Since 2012, marketing authorization holders are required to report shortages and otherwise  
56 subjected to financial sanctions since 2016. Regulatory changes may impact the reporting of drug  
57 shortage. Yet, not all drugs were affected by shortage in our study, which goes beyond regulatory  
58  
59  
60



1  
2  
3 changes and is more concordant with increased needs along with inadequate production and supply  
4 issues. Raw material shortages and production issues have been considered global and as having  
5 similar impacts in European countries.<sup>3, 4, 12</sup> Manufacturing problems stem from concentration and  
6 rationalization of pharmaceutical manufacturing, as well as globalization.<sup>3</sup> In our study, material and  
7 manufacturing issues were the main causes of shortages each year and a rise in shortages related to  
8 pharmaceutical market was observed over the years. One explanation may be a rise in the global use  
9 of pharmaceutical products worldwide. The structure of the pharmaceutical market was previously  
10 found to be a key determinant of drug shortages in Finland.<sup>12</sup> In our study, pharmaceutical market  
11 issues included hospital trade and competitive bidding tenders that may contribute to compromise  
12 the supply of MTI drugs at hospital.  
13  
14  
15  
16  
17  
18  
19

20 Some limitations to the present study should be noted. First, the results were relating to shortage of  
21 MTI drugs from national stocks supplies, which may not allow generalization to all drugs, although  
22 MTI drugs include all therapeutic classes. Second, the data were sourced from statement reports of  
23 marketing authorization holders and missing data cannot be ruled out. According to the definition of  
24 drug shortages in France, short supply was not considered in the present study. The combination of  
25 data from both authorities and pharmacy practice has been suggested to improve the surveillance.<sup>31</sup>  
26 This requires a standardization of definition of drug shortages between European members. Yet, the  
27 financial penalty for non-compliance with mandatory declaration of marketing authorization holders  
28 limits the cases of under-reporting and shortages of MTI drugs would obviously be reported to the  
29 ANSM by health professionals or patients otherwise. Third, the data relating to effective and  
30 predicted drug shortages may not reflect the effective short supplies, thus limiting the clinical  
31 interpretations of the present results. Fourth, reporting effective or predictive shortages to ANSM is  
32 required. There will indeed be cases where the risk of shortage will not become a short supply, but  
33 these two situations both reflect a production problem and may lead to short supply.  
34  
35  
36  
37  
38  
39  
40  
41  
42  
43  
44

45 Strengths of the present study include the analysis of a national reporting system over a 7 years  
46 period. This is the first study to analyze the issue of drug shortages in France. Trends of drug  
47 shortages were described according to pharmaceutical products and INN drugs, allowing a more  
48 detailed description and interpretation of drug shortages and their causes.  
49  
50  
51

52 Reporting of drug shortages has been required to be standardized between all European member  
53 States as well as coordination of legal and organizational strategies.<sup>3, 4</sup> A European collaboration  
54 (Task Force) set up by the European Medicine Agency is ongoing since 2016, to provide support and  
55 advice to tackle disruptions in supply of medicines and ensure their continued availability.<sup>32</sup>  
56 According to Woodcock & al,<sup>33</sup> it would be useful to stimulate investments to increase industrial  
57  
58  
59  
60

1  
2  
3 production capacities, in particular for injectable drugs. Moreover, data of the financial impact of  
4 drug shortages are lacking. A calculation of the opportunity cost would be an argument to stimulate  
5 these investments.  
6  
7

## 8 9 **CONCLUSION**

10  
11 Shortage reports of major therapeutic of interest drugs were frequent and increasing over the 2012  
12 to 2018 period in France. Preventive measures, including contingency plans, should particularly  
13 target old drugs, injectables, antiinfectives, nervous system, cardiovascular system drugs as well as  
14 antineoplastic and immunomodulating agents. The issue of drug shortages goes beyond national  
15 concerns. Many drugs reported on shortages being granted by a European marketing authorization.  
16 Even if the characteristics of drugs and reasons of shortages found in the present study are likely to  
17 be generalized to Europe, further studies are needed to address drug shortages at the European  
18 level.  
19  
20  
21  
22  
23  
24  
25  
26  
27  
28  
29  
30  
31  
32  
33  
34  
35  
36  
37  
38  
39  
40  
41  
42  
43  
44  
45  
46  
47  
48  
49  
50  
51  
52  
53  
54  
55  
56  
57  
58  
59  
60

**Contributors**

AB contributed to data collection and data analysis. PM designed the project. SI, CRC and PM contributed to methods of the study. All authors contributed to the interpretation of data and to the writing of the manuscript.

**Funding :**

none

**Acknowledgments/disclaimer**

The authors thank the drug shortages team and the surveillance division of the French National Agency for Medicine and Health Product Safety. They would also like to thank Natacha Marpillat as medical writer, as well as the professors' team of Strasbourg Faculty of Pharmacy.

**Data sharing**

Data were reported from the pharmaceutical companies and confidential

**Competing interests :**

None

## REFERENCES

1. Gray A, Manasse HR, Jr. Shortages of medicines: a complex global challenge. *Bull World Health Organ* 2012;90:158-A.
2. Fox ER, Sweet BV, Jensen V. Drug shortages: a complex health care crisis. *Mayo Clin Proc* 2014;89:361-73.
3. Bogaert P, Bochenek T, Prokop A *et al*. A Qualitative Approach to a Better Understanding of the Problems Underlying Drug Shortages, as Viewed from Belgian, French and the European Union's Perspectives. *PLoS One* 2015;10:e0125691.
4. Pauwels K, Huys I, Casteels M, *et al*. Drug shortages in European countries: a trade-off between market attractiveness and cost containment? *BMC Health Serv Res* 2014;14:438.
5. Yang C, Wu L, Cai W *et al*. Current situation, determinants, and solutions to drug shortages in Shaanxi province, China: a qualitative study. *PLoS One* 2016;11:e0165183.
6. Morris S. Medicine shortages in Australia - what are we doing about them? *Aust Prescr* 2018;41:136-7.
7. Bauters T, Claus BO, Norga K, *et al*. Chemotherapy drug shortages in paediatric oncology: A 14-year single-centre experience in Belgium. *J Oncol Pharm Pract* 2016;22:766-70.
8. WHO. Meeting report: technical definitions of shortages and stock outs of medicines and vaccines. 2016.
9. Rider AE, Templet DJ, Daley MJ, *et al*. Clinical dilemmas and a review of strategies to manage drug shortages. *J Pharm Pract* 2013;26:183-91.
10. McLaughlin M, Kotis D, Thomson K, *et al*. Effects on patient care caused by drug shortages: a survey. *J Manag Care Pharm* 2013;19(9):783-8.
11. Fox ER, Tyler LS. Potential association between drug shortages and high-cost medications. *Pharmacotherapy* 2017;37(1):36-42.
12. Heiskanen K, Ahonen R, Kanerva R, *et al*. The reasons behind medicine shortages from the perspective of pharmaceutical companies and pharmaceutical wholesalers in Finland. *PLoS One* 2017;12:e0179479.
13. De Weerd E, Simoens S, Hombroeckx L, *et al*. Causes of drug shortages in the legal pharmaceutical framework. *Regul Toxicol Pharmacol* 2015;71:251-8.
14. Decree 2012-1096 of September 2012 on the supply of medicines for human use. Official Journal of the French Republic of 30th September 2012.
15. Act No 2016-41 of the 26th January 2016 on the modernization of the French healthcare system. Official Journal of the French Republic of 27th January 2016.
16. Ministerial Order of July 27th 2016 listing the therapeutic classes comprising medicinal products of major therapeutic interest mentioned in Article L. 5121-31 of the Public Health Code.
17. Bocquet F, Degrasat-Theas A, Peigne J, *et al*. The new regulatory tools of the 2016 Health Law to fight drug shortages in France. *Health Policy* 2017;121:471-6.
18. Griffith MM, Gross AE, Sutton SH, *et al*. The impact of anti-infective drug shortages on hospitals in the United States: trends and causes. *Clin Infect Dis* 2012;54:684-91.
19. Hawley KL, Mazer-Amirshahi M, Zocchi MS, *et al*. Longitudinal trends in U.S. drug shortages for medications used in emergency departments (2001-2014). *Acad Emerg Med* 2016;23:63-9.
20. Mazer-Amirshahi M, Goyal M, Umar SA, *et al*. U.S. drug shortages for medications used in adult critical care (2001-2016). *J Crit Care* 2017;41:283-8.
21. Mazer-Amirshahi M, Pourmand A, Singer S, *et al*. Critical drug shortages: implications for emergency medicine. *Acad Emerg Med* 2014;21:704-11.

- 1
- 2
- 3 22. Pauwels K, Simoens S, Casteels M, *et al*. Insights into European drug shortages: a survey of
- 4 hospital pharmacists. *PLoS One* 2015;10:e0119322.
- 5 23. WHO Collaborating Centre for Drug Statistics Methodology. ATC/DDC Index 2018.
- 6 [www.whocc.no/atc\\_ddd\\_index/](http://www.whocc.no/atc_ddd_index/).
- 7 24. French Agency of Medicine and Health Product Safety : annual activity report.
- 8 [https://www.ansm.sante.fr/var/ansm\\_site/storage/original/application/8c5a443c987ce4040](https://www.ansm.sante.fr/var/ansm_site/storage/original/application/8c5a443c987ce404048ed5af9d1b73cc.pdf)
- 9 [48ed5af9d1b73cc.pdf](https://www.ansm.sante.fr/var/ansm_site/storage/original/application/8c5a443c987ce404048ed5af9d1b73cc.pdf).
- 10 25. Drug shortages statistics. [https://www.ashp.org/drug-shortages/shortage-resources/drug-](https://www.ashp.org/drug-shortages/shortage-resources/drug-shortages-statistics)
- 11 [shortages-statistics](https://www.ashp.org/drug-shortages/shortage-resources/drug-shortages-statistics).
- 12 26. Quadri F, Mazer-Amirshahi M, Fox ER, *et al*. Antibacterial drug shortages from 2001 to 2013:
- 13 implications for clinical practice. *Clin Infect Dis* 2015;60(12):1737-42.
- 14 27. Parsons HM, Schmidt S, Karnad AB, *et al*. Association between the number of suppliers for
- 15 critical antineoplastics and drug shortages: implications for future drug shortages and
- 16 treatment. *J Oncol Pract* 2016;12:e289-98,49-50.
- 17 28. Gogineni K, Shuman KL, Emanuel EJ. Survey of oncologists about shortages of cancer drugs. *N*
- 18 *Engl J Med* 2013;369:2463-4.
- 19 29. French National Agency of Medicine and Health Product Safety : [www.valsartan-info.fr](http://www.valsartan-info.fr).
- 20 30. Reed BN, Fox ER, Konig M, *et al*. The impact of drug shortages on patients with
- 21 cardiovascular disease: causes, consequences, and a call to action. *Am Heart J* 2016;175:130-
- 22 41.
- 23 31. Postma DJ, De Smet P, Gispens-de Wied CC, *et al*. Drug shortages from the perspectives of
- 24 authorities and pharmacy practice in the Netherlands: an observational study. *Front*
- 25 *pharmacol* 2018;9:1243.
- 26 32. European Medicine Agency. Towards improving the availability of medicines in the EU. 2018 :
- 27 [https://www.ema.europa.eu/en/documents/press-release/towards-improving-availability-](https://www.ema.europa.eu/en/documents/press-release/towards-improving-availability-medicines-eu_en.pdf)
- 28 [medicines-eu\\_en.pdf](https://www.ema.europa.eu/en/documents/press-release/towards-improving-availability-medicines-eu_en.pdf).
- 29 33. Woodcock J, & Wosinska M. Economic and technological drivers of generic sterile injectable
- 30 drug shortages. *Clin Pharmacol Ther*. 2013 Feb; 93(2): 170-6
- 31
- 32
- 33
- 34
- 35
- 36
- 37
- 38
- 39
- 40
- 41
- 42
- 43
- 44
- 45
- 46
- 47
- 48
- 49
- 50
- 51
- 52
- 53
- 54
- 55
- 56
- 57
- 58
- 59
- 60

**Table 1 Characteristics of pharmaceutical products reported on shortage in 2012-2018**

|                                                     | <b>2012-2018</b>  |
|-----------------------------------------------------|-------------------|
|                                                     | <b>n (%)</b>      |
| <b>Total</b>                                        | <b>3530 (100)</b> |
| <b>Marketing authorization procedures</b>           |                   |
| National                                            | 2217 (62.8)       |
| European                                            | 1249 (35.4)       |
| Unavailable data                                    | 64 (1.81)         |
| <b>Duration of marketing authorization grants</b>   |                   |
| > 10 years                                          | 2237 (63.4)       |
| ≤ 10 years                                          | 1212 (34.3)       |
| Unavailable data                                    | 81 (2.30)         |
| <b>Pharmaceutical forms</b>                         |                   |
| Oral                                                | 1529 (43.3)       |
| Injectable                                          | 1675 (47.5)       |
| Others                                              | 326 (9.24)        |
| <b>Storage conditions</b>                           |                   |
| Ambient temperature                                 | 2995 (84.8)       |
| +2°C < Temperature < +8°C                           | 533 (16.0)        |
| - 18°C < Temperature                                | 2 (0.00)          |
| <b>ATC Classes</b>                                  |                   |
| Alimentary tract and metabolism                     | 217 (6.15)        |
| Antiinfectives for systemic use                     | 634 (18.0)        |
| Antineoplastic and immunomodulating agents          | 367 (10.4)        |
| Antiparasitic products, insecticides and repellents | 39 (1.10)         |
| Blood and blood forming organs                      | 312 (8.84)        |
| Cardiovascular system                               | 442 (12.5)        |
| Dermatologicals                                     | 59 (1.67)         |
| Genitourinary system and reproductive hormones      | 151 (4.30)        |
| Musculoskeletal system                              | 155 (4.40)        |
| Nervous system                                      | 613 (17.4)        |
| Respiratory system                                  | 119 (3.40)        |
| Sensory organs                                      | 97 (2.80)         |
| Systemic hormonal preparations                      | 160 (4.53)        |
| Various/others                                      | 165 (4.70)        |

**Figures legends**

Figure 1 Trends in shortages by numbers of pharmaceutical products and International Nonproprietary Name drugs (INN) (2012-2018) in France.

Figure 2 Trends in the proportion of pharmaceutical products on shortage by ATC classes (2012-2018)

Figure 3 Trends in the proportion of pharmaceutical products on shortage by duration of marketing authorization grants

Figure 4 Trends in the causes of shortages of pharmaceutical products in 2015-2018

CONFIDENTIAL  
For peer review only

1  
2  
3 **Figure 1 Trends in shortages by numbers of pharmaceutical products and International Nonproprietary**  
4 **Name drugs (INN) (2012-2018) in France.**  
5  
6

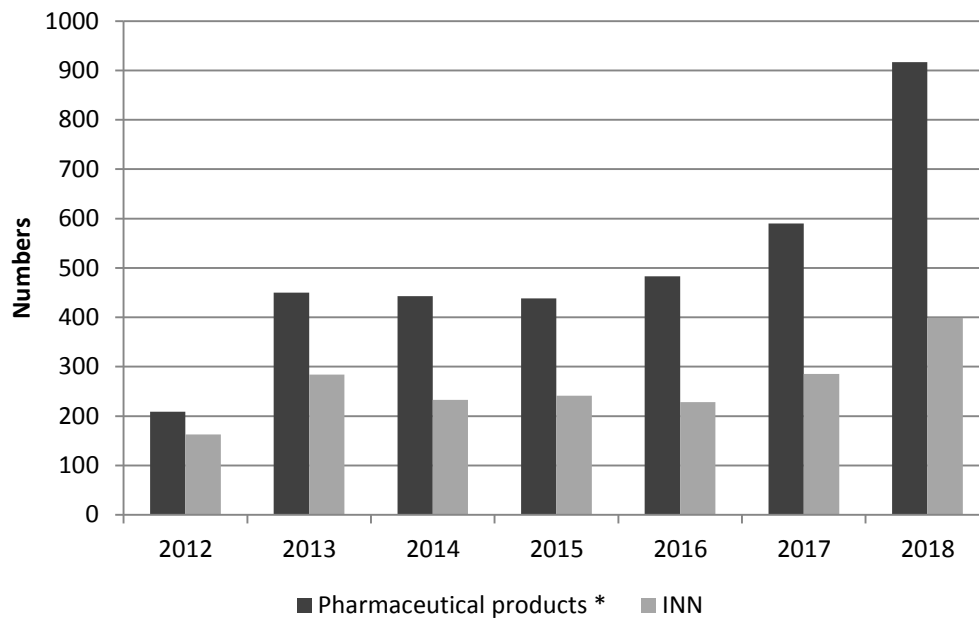

\* **Pharmaceutical products:** defined by a combination of the International Nonproprietary Name (INN), the formulation and the packaging

review only



**Figure 2 Trends in the proportion of pharmaceutical products on shortage by ATC classes (2012-2018)**



For review only

1  
2  
3  
4  
5 **Figure 3 Trends in the proportion of pharmaceutical products on shortage by duration of marketing**  
6 **authorization grants (2012-2018)**  
7  
8



Figure 4 Trends in the causes of shortages of pharmaceutical products in 2015-2018

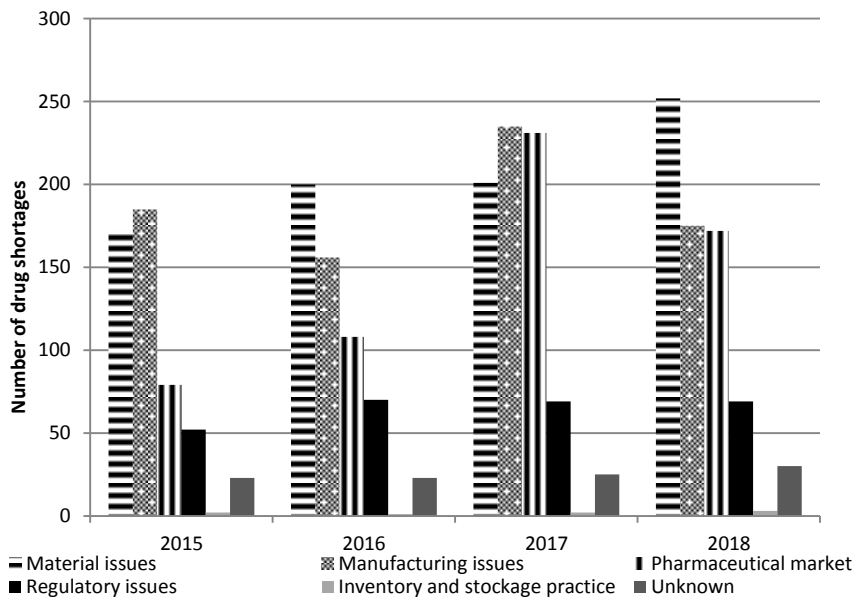

Peer review only

Order of 27 July 2016 fixing the list of therapeutic classes containing major therapeutic of interest drug mentioned in Article L. 5121-31 of the Public Health Code

**A. – ALIMENTARY TRACT AND METABOLISM**

A02 - DRUGS FOR ACID RELATED DISORDERS  
A02B - DRUGS FOR PEPTIC ULCER AND GASTRO-OESOPHAGEAL REFLUX DISEASE (GORD)  
A03 - DRUGS FOR FUNCTIONAL GASTROINTESTINAL DISORDERS  
A03B - BELLADONNA AND DERIVATIVES, PLAIN  
A04 - ANTIEMETICS AND ANTINAUSEANTS  
A04A - ANTIEMETICS AND ANTINAUSEANTS  
A05 - BILE AND LIVER THERAPY  
A05A - BILE THERAPY  
A05B - LIVER THERAPY, LIPOTROPICS  
A06 - DRUGS FOR CONSTIPATION  
A06A - DRUGS FOR CONSTIPATION  
A07 - ANTIDIARRHEALS, INTESTINAL ANTIINFLAMMATORY/ ANTIINFECTIVE AGENTS  
A07A - INTESTINAL ANTIINFECTIVES  
A07E - INTESTINAL ANTIINFLAMMATORY AGENTS  
A10 - DRUGS USED IN DIABETES  
A10A - INSULINS AND ANALOGUES  
A10B - BLOOD GLUCOSE LOWERING DRUGS, EXCL. INSULINS  
A11 - VITAMINS  
A11C - VITAMIN A AND D, INCL. COMBINATIONS OF THE TWO  
A11D - VITAMIN B1, PLAIN AND IN COMBINATION WITH VITAMIN B6 AND B12  
A11H - OTHER PLAIN VITAMIN PREPARATIONS  
A11J - OTHER VITAMIN PRODUCTS, COMBINATIONS  
A12 - MINERAL SUPPLEMENTS  
A12A - CALCIUM  
A12B - POTASSIUM  
A12C - OTHER MINERAL SUPPLEMENTS  
A16 - OTHER ALIMENTARY TRACT AND METABOLISM PRODUCTS  
A16A - OTHER ALIMENTARY TRACT AND METABOLISM PRODUCTS

**B. – BLOOD AND BLOOD FORMING ORGANS**

B01 - ANTITHROMBOTIC AGENTS  
B01A - ANTITHROMBOTIC AGENTS  
B02 - ANTIHEMORRHAGICS  
B02A - ANTIFIBRINOLYTICS  
B02B - VITAMIN K AND OTHER HEMOSTATICS  
B03 - ANTIANEMIC PREPARATIONS  
B03A - IRON PREPARATIONS  
B03B - VITAMIN B12 AND FOLIC ACID  
B03X - OTHER ANTIANEMIC PREPARATIONS  
B05 - BLOOD SUBSTITUTES AND PERFUSION SOLUTIONS  
B05A - BLOOD AND RELATED PRODUCTS

1  
2  
3 B05B - I.V. SOLUTIONS  
4 B05D - PERITONEAL DIALYTICS  
5 B05X - I.V. SOLUTION ADDITIVES  
6 B05Z - HEMODIALYTICS AND HEMOFILTRATES  
7 B06 - OTHER HEMATOLOGICAL AGENTS  
8 B06A - OTHER HEMATOLOGICAL AGENTS  
9  
10

### 11 C. – CARDIOVASCULAR SYSTEM

12  
13  
14 C01 - CARDIAC THERAPY  
15 C01A - CARDIAC GLYCOSIDES  
16 C01B - ANTIARRHYTHMICS, CLASS I AND III  
17 C01C - CARDIAC STIMULANTS EXCL. CARDIAC GLYCOSIDES  
18 C01D - VASODILATORS USED IN CARDIAC DISEASES  
19 C01E - OTHER CARDIAC PREPARATIONS  
20 C02 - ANTIHYPERTENSIVES  
21 C02A - ANTIADRENERGIC AGENTS, CENTRALLY ACTING  
22 C02B - ANTIADRENERGIC AGENTS, GANGLION-BLOCKING  
23 C02C - ANTIADRENERGIC AGENTS, PERIPHERALLY ACTING  
24 C02D - ARTERIOLAR SMOOTH MUSCLE, AGENTS ACTING ON  
25 C02K - OTHER ANTIHYPERTENSIVES  
26 C02L - ANTIHYPERTENSIVES AND DIURETICS IN COMBINATION  
27 C02N - COMBINATIONS OF ANTIHYPERTENSIVES IN ATC-GR. C02  
28 C03 - DIURETICS  
29 C03A - LOW-CEILING DIURETICS, THIAZIDES  
30 C03B - LOW-CEILING DIURETICS, EXCL. THIAZIDES  
31 C03C - HIGH-CEILING DIURETICS  
32 C03D - POTASSIUM-SPARING AGENTS  
33 C03E - DIURETICS AND POTASSIUM-SPARING AGENTS IN COMBINATION  
34 C03X - OTHER DIURETICS  
35 C07 - BETA BLOCKING AGENTS  
36 C07A - BETA BLOCKING AGENTS  
37 C07B - BETA BLOCKING AGENTS AND THIAZIDES  
38 C07C - BETA BLOCKING AGENTS AND OTHER DIURETICS  
39 C07D - BETA BLOCKING AGENTS, THIAZIDES AND OTHER DIURETICS  
40 C07E - BETA BLOCKING AGENTS AND VASODILATORS  
41 C07F - BETA BLOCKING AGENTS AND OTHER ANTIHYPERTENSIVES  
42 C08 - CALCIUM CHANNEL BLOCKERS  
43 C08C - SELECTIVE CALCIUM CHANNEL BLOCKERS WITH MAINLY VASCULAR EFFECTS  
44 C08D - SELECTIVE CALCIUM CHANNEL BLOCKERS WITH DIRECT CARDIAC EFFECTS  
45 C08E - NON-SELECTIVE CALCIUM CHANNEL BLOCKERS  
46  
47  
48  
49 C08G - CALCIUM CHANNEL BLOCKERS AND DIURETICS  
50 C09 - AGENTS ACTING ON THE RENIN-ANGIOTENSIN SYSTEM  
51 C09A - ACE INHIBITORS, PLAIN  
52 C09B - ACE INHIBITORS, COMBINATIONS  
53 C09C - ANGIOTENSIN II ANTAGONISTS, PLAIN  
54  
55  
56  
57  
58  
59  
60

1  
2  
3 C09D - ANGIOTENSIN II ANTAGONISTS, COMBINATIONS  
4 C09X - OTHER AGENTS ACTING ON THE RENIN-ANGIOTENSIN SYSTEM  
5 C010 - LIPID MODIFYING AGENTS  
6 C10A - LIPID MODIFYING AGENTS, PLAIN  
7

#### 8 9 **D. – DERMATOLOGICALS**

10  
11 D01 - ANTIFUNGALS FOR DERMATOLOGICAL USE  
12 D01A - ANTIFUNGALS FOR TOPICAL USE  
13 D01B - ANTIFUNGALS FOR SYSTEMIC USE  
14 D03 - PREPARATIONS FOR TREATMENT OF WOUNDS AND ULCERS  
15 D03B - ENZYMES  
16 D05 - ANTIPSORIATICS  
17 D05A - ANTIPSORIATICS FOR TOPICAL USE  
18 D05B - ANTIPSORIATICS FOR SYSTEMIC USE  
19 D06 - ANTIBIOTICS AND CHEMOTHERAPEUTICS FOR DERMATOLOGICAL USE  
20 D07 - CORTICOSTEROIDS, DERMATOLOGICAL PREPARATIONS  
21 D07A - CORTICOSTEROIDS, PLAIN  
22 D08 - ANTISEPTICS AND DISINFECTANTS  
23 D08A - ANTISEPTICS AND DISINFECTANTS  
24 D11 - OTHER DERMATOLOGICAL PREPARATIONS  
25 D11A - OTHER DERMATOLOGICAL PREPARATIONS  
26  
27  
28  
29

#### 30 31 **G. – GENITO URINARY SYSTEM AND SEX HORMONES**

32  
33 G01 - GYNECOLOGICAL ANTIINFECTIVES AND ANTISEPTICS  
34 G02 - OTHER GYNECOLOGICALS  
35 G02A - OXYTOCICS  
36 G02B - CONTRACEPTIVES FOR TOPICAL USE  
37 G02C - OTHER GYNECOLOGICALS  
38 G03 - SEX HORMONES AND MODULATORS OF THE GENITAL SYSTEM  
39 G03A - HORMONAL CONTRACEPTIVES FOR SYSTEMIC USE  
40 G03B - ANDROGENS  
41 G03C - ESTROGENS  
42 G03D - PROGESTOGENS  
43 G03G - GONADOTROPINS AND OTHER OVULATION STIMULANTS  
44 G03H - ANTIANDROGENS  
45 G03X - OTHER SEX HORMONES AND MODULATORS OF THE GENITAL SYSTEM  
46  
47  
48  
49

#### 50 51 **H. – SYSTEMIC HORMONAL PREPARATIONS, EXCL. SEX HORMONES AND INSULINS**

52  
53 H01 - PITUITARY AND HYPOTHALAMIC HORMONES AND ANALOGUES  
54 H01A - ANTERIOR PITUITARY LOBE HORMONES AND ANALOGUES  
55 H01B - POSTERIOR PITUITARY LOBE HORMONES  
56 H01C - HYPOTHALAMIC HORMONES  
57 H02 - CORTICOSTEROIDS FOR SYSTEMIC USE  
58 H02A - CORTICOSTEROIDS FOR SYSTEMIC USE, PLAIN  
59 H02C - ANTIADRENAL PREPARATIONS  
60

1  
2  
3 H03 - THYROID THERAPY  
4 H03A - THYROID PREPARATIONS  
5 H03B - ANTITHYROID PREPARATIONS  
6 H03C - IODINE THERAPY  
7  
8 H04 - PANCREATIC HORMONES  
9 H04A - GLYCOGENOLYTIC HORMONES  
10 H05 - CALCIUM HOMEOSTASIS  
11 H05A - PARATHYROID HORMONES AND ANALOGUES  
12 H05B - ANTI-PARATHYROID AGENTS  
13  
14

#### 15 **J. – ANTIINFECTIVES FOR SYSTEMIC USE**

16  
17 J01 - ANTIBACTERIALS FOR SYSTEMIC USE  
18 J01A - TETRACYCLINES  
19 J01B - AMPHENICOLS  
20 J01C - BETA-LACTAM ANTIBACTERIALS, PENICILLINS  
21 J01D - OTHER BETA-LACTAM ANTIBACTERIALS  
22 J01E - SULFONAMIDES AND TRIMETHOPRIM  
23 J01F - MACROLIDES, LINCOSAMIDES AND STREPTOGRAMINS  
24 J01G - AMINOGLYCOSIDE ANTIBACTERIALS  
25 J01M - QUINOLONE ANTIBACTERIALS  
26 J01R - COMBINATIONS OF ANTIBACTERIALS  
27 J01X - OTHER ANTIBACTERIALS  
28 J02 - ANTIMYCOTICS FOR SYSTEMIC USE  
29 J02A - ANTIMYCOTICS FOR SYSTEMIC USE  
30 J04 - ANTIMYCOBACTERIALS  
31 J04A - DRUGS FOR TREATMENT OF TUBERCULOSIS  
32 J04B - DRUGS FOR TREATMENT OF LEPROSY  
33 J05 - ANTIVIRALS FOR SYSTEMIC USE  
34 J05A - DIRECT ACTING ANTIVIRALS  
35 J06 - IMMUNE SERA AND IMMUNOGLOBULINS  
36 J06A - IMMUNE SERA  
37 J06B - IMMUNOGLOBULINS  
38 J07 - VACCINES  
39 J07A - BACTERIAL VACCINES  
40 J07B - VIRAL VACCINES  
41 J07C - BACTERIAL AND VIRAL VACCINES, COMBINED  
42  
43  
44  
45  
46  
47  
48

#### 49 **L. – ANTINEOPLASTIC AND IMMUNOMODULATING AGENTS**

50  
51 L01 - ANTINEOPLASTIC AGENTS  
52 L01A - ALKYLATING AGENTS  
53 L01B - ANTIMETABOLITES  
54 L01C - PLANT ALKALOIDS AND OTHER NATURAL PRODUCTS  
55 L01D - CYTOTOXIC ANTIBIOTICS AND RELATED SUBSTANCES  
56 L01X - OTHER ANTINEOPLASTIC AGENTS  
57 L02 - ENDOCRINE THERAPY  
58 L02A - HORMONES AND RELATED AGENTS  
59  
60

1  
2  
3 L02B - HORMONE ANTAGONISTS AND RELATED AGENTS

4 L03 - IMMUNOSTIMULANTS

5 L03A - IMMUNOSTIMULANTS

6 L04 - IMMUNOSUPPRESSANTS

7 L04A - IMMUNOSUPPRESSANTS

8  
9  
10 **M. – MUSCULO-SKELETAL SYSTEM**

11  
12 M03 - MUSCLE RELAXANTS

13 M03A - MUSCLE RELAXANTS, PERIPHERALLY ACTING AGENTS

14 M03B - MUSCLE RELAXANTS, CENTRALLY ACTING AGENTS

15 M03C - MUSCLE RELAXANTS, DIRECTLY ACTING AGENTS

16 M04 - ANTIGOUT PREPARATIONS

17 M04A - ANTIGOUT PREPARATIONS

18 M05 - DRUGS FOR TREATMENT OF BONE DISEASES

19 M05B - DRUGS AFFECTING BONE STRUCTURE AND MINERALIZATION

20  
21  
22  
23  
24  
25 **N. – NERVOUS SYSTEM**

26 N01 - ANESTHETICS

27 N01A - ANESTHETICS, GENERAL

28 N01B - ANESTHETICS, LOCAL

29 N02 - ANALGESICS

30 N02A - OPIOIDS

31 N02B - OTHER ANALGESICS AND ANTIPYRETICS

32 N03 - ANTIEPILEPTICS

33 N03A - ANTIEPILEPTICS

34 N04 - ANTI-PARKINSON DRUGS

35 N04A - ANTICHOLINERGIC AGENTS

36 N04B - DOPAMINERGIC AGENTS

37 N05 - PSYCHOLEPTICS

38 N05A - ANTIPSYCHOTICS

39 N05B - ANXIOLYTICS

40 N06 - PSYCHOANALEPTICS

41 N06A - ANTIDEPRESSANTS

42 N06B - PSYCHOSTIMULANTS, AGENTS USED FOR ADHD AND NOOTROPICS

43 N06D - ANTI-DEMENTIA DRUGS

44 N07 - OTHER NERVOUS SYSTEM DRUGS

45 N07A - PARASYMPATHOMIMETICS

46 N07B - DRUGS USED IN ADDICTIVE DISORDERS

47 N07X - OTHER NERVOUS SYSTEM DRUGS

48  
49  
50  
51  
52  
53  
54  
55  
56 **P. – ANTIPARASITIC PRODUCTS, INSECTICIDES, AND REPELLENTS**

57 P01 - ANTIPROTOZOALS

58 P01A - AGENTS AGAINST AMOEBIASIS AND OTHER PROTOZOAL DISEASES



1  
2  
3 P01B - ANTIMALARIALS  
4 P01C - AGENTS AGAINST LEISHMANIASIS AND TRYPANOSOMIASIS  
5 P02 - ANTHELMINTICS  
6 P02B - ANTITREMATODALS  
7 P02C - ANTINEMATODAL AGENTS  
8 P02D - ANTICESTODALS  
9  
10 P03 - ECTOPARASITICIDES, INCL. SCABICIDES, INSECTICIDES AND REPELLENTS  
11 P03A - ECTOPARASITICIDES, INCL. SCABICIDES  
12  
13

#### 14 **R. – RESPIRATORY SYSTEM**

15

16 R03 - DRUGS FOR OBSTRUCTIVE AIRWAY DISEASES  
17 R03A - ADRENERGICS, INHALANTS  
18 R03B - OTHER DRUGS FOR OBSTRUCTIVE AIRWAY DISEASES, INHALANTS  
19 R03C - ADRENERGICS FOR SYSTEMIC USE  
20 R03D - OTHER SYSTEMIC DRUGS FOR OBSTRUCTIVE AIRWAY DISEASES  
21 R06 - ANTIHISTAMINES FOR SYSTEMIC USE  
22 R06A - ANTIHISTAMINES FOR SYSTEMIC USE  
23 R07 - OTHER RESPIRATORY SYSTEM PRODUCTS  
24 R07A - OTHER RESPIRATORY SYSTEM PRODUCTS  
25  
26  
27

#### 28 **S. – SENSORY ORGANS**

29

30  
31 S01 - OPHTHALMOLOGICALS  
32 S01A - ANTIINFECTIVES  
33 S01B - ANTIINFLAMMATORY AGENTS  
34 S01E - ANTIGLAUCOMA PREPARATIONS AND MIOTICS  
35 S01F - MYDRIATICS AND CYCLOPLEGICS  
36 S01H - LOCAL ANESTHETICS  
37 S01J - DIAGNOSTIC AGENTS  
38 S01L - DRUGS AGAINST OCULO-VASCULAR DISORDERS  
39 S01X - OTHER OPHTHALMOLOGICALS  
40  
41 S02 - OTOLOGICALS  
42 S02A - ANTIINFECTIVES  
43 S02B - CORTICOSTEROIDS  
44  
45

#### 46 **V. - VARIOUS**

47

48  
49 V01 - ALLERGENS  
50 V01A - ALLERGENS  
51 V03 - ALL OTHER THERAPEUTIC PRODUCTS  
52 V03A - ALL OTHER THERAPEUTIC PRODUCTS  
53 V04 - DIAGNOSTIC AGENTS  
54 V04C - OTHER DIAGNOSTIC AGENTS  
55 V08 - CONTRAST MEDIA  
56 V08A - X-RAY CONTRAST MEDIA, IODINATED  
57 V08B - X-RAY CONTRAST MEDIA, NON-IODINATED  
58 V08C - MAGNETIC RESONANCE IMAGING CONTRAST MEDIA  
59  
60

1  
2  
3 V08D - ULTRASOUND CONTRAST MEDIA  
4 V09 - DIAGNOSTIC RADIOPHARMACEUTICALS  
5 V09A - CENTRAL NERVOUS SYSTEM  
6 V09B - SKELETON  
7 V09C - RENAL SYSTEM  
8 V09D - HEPATIC AND RETICULO ENDOTHELIAL SYSTEM  
9 V09E - RESPIRATORY SYSTEM  
10 V09F - THYROID  
11 V09G - CARDIOVASCULAR SYSTEM  
12 V09H - INFLAMMATION AND INFECTION DETECTION  
13 V09I - TUMOUR DETECTION  
14 V09X - OTHER DIAGNOSTIC RADIOPHARMACEUTICALS  
15 V10 - THERAPEUTIC RADIOPHARMACEUTICALS  
16 V10A - ANTIINFLAMMATORY AGENTS  
17 V10B - PAIN PALLIATION (BONE SEEKING AGENTS)  
18 V10X - OTHER THERAPEUTIC RADIOPHARMACEUTICALS  
19  
20  
21  
22  
23  
24  
25  
26  
27  
28  
29  
30  
31  
32  
33  
34  
35  
36  
37  
38  
39  
40  
41  
42  
43  
44  
45  
46  
47  
48  
49  
50  
51  
52  
53  
54  
55  
56  
57  
58  
59  
60

peer review only

**STROBE Statement**—Checklist of items that should be included in reports of *cross-sectional studies*

## The French reporting system for drug shortages: description and trends from 2012 to 2018. An observational retrospective study

|                          | Item No | Recommendation                                                                                                                                                                                 |    | Page number    |
|--------------------------|---------|------------------------------------------------------------------------------------------------------------------------------------------------------------------------------------------------|----|----------------|
| Title and abstract       | 1       | (a) Indicate the study's design with a commonly used term in the title or the abstract                                                                                                         | OK | 2 of 45        |
|                          |         | (b) Provide in the abstract an informative and balanced summary of what was done and what was found                                                                                            | OK | 2 of 45        |
| <b>Introduction</b>      |         |                                                                                                                                                                                                |    |                |
| Background/rationale     | 2       | Explain the scientific background and rationale for the investigation being reported                                                                                                           | OK | 4 of 45        |
| Objectives               | 3       | State specific objectives, including any prespecified hypotheses                                                                                                                               | OK | 4 & 5 of 45    |
| <b>Methods</b>           |         |                                                                                                                                                                                                |    |                |
| Study design             | 4       | Present key elements of study design early in the paper                                                                                                                                        | OK | 5 of 45        |
| Setting                  | 5       | Describe the setting, locations, and relevant dates, including periods of recruitment, exposure, follow-up, and data collection                                                                | OK | 5 of 45        |
| Participants             | 6       | (a) Give the eligibility criteria, and the sources and methods of selection                                                                                                                    | OK | 5&6 of 45      |
| Variables                | 7       | Clearly define all outcomes                                                                                                                                                                    | OK | 5&6 of 45      |
| Data sources/measurement | 8*      | For each variable of interest, give sources of data and details of methods of assessment (measurement).                                                                                        | OK | 5&6 of 45      |
| Bias                     | 9       | Describe any efforts to address potential sources of bias                                                                                                                                      | OK | 6 of 45        |
| Study size               | 10      | Explain how the study size was arrived at                                                                                                                                                      | OK | 5&6 of 45      |
| Quantitative variables   | 11      | Explain how quantitative variables were handled in the analyses. If applicable, describe which groupings were chosen and why                                                                   | OK | 5&6 of 45      |
| Statistical methods      | 12      | (a) Describe all statistical methods, including those used to control for confounding                                                                                                          | OK | 5&6 of 45      |
|                          |         | (b) Describe any methods used to examine subgroups and interactions                                                                                                                            | OK | 5&6 of 45      |
|                          |         | (c) Explain how missing data were addressed                                                                                                                                                    | OK | 6 of 45        |
|                          |         | (d) If applicable, describe analytical methods taking account of sampling strategy                                                                                                             | NA | NA             |
|                          |         | (e) Describe any sensitivity analyses                                                                                                                                                          | NA | NA             |
| <b>Results</b>           |         |                                                                                                                                                                                                |    |                |
| Participants             | 13*     | (a) Report numbers of products at each stage of study—eg numbers potentially eligible, examined for eligibility, confirmed eligible, included in the study, completing follow-up, and analysed | OK | 6,7 & 15 of 45 |
|                          |         | (b) Give reasons for non-participation at each stage                                                                                                                                           | NA | NA             |
|                          |         | (c) Consider use of a flow diagram                                                                                                                                                             | NA | NA             |
| Descriptive data         | 14*     | (a) Give characteristics of study participants (eg demographic,                                                                                                                                | NA | NA             |

|                          |     |                                                                                                                                                                                                              |    |                |
|--------------------------|-----|--------------------------------------------------------------------------------------------------------------------------------------------------------------------------------------------------------------|----|----------------|
|                          |     | clinical, social) and information on exposures and potential confounders                                                                                                                                     |    |                |
|                          |     | (b) Indicate number of products with missing data for each variable of interest                                                                                                                              | OK | 15 of 45       |
| Outcome data             | 15* | Report numbers of outcome events or summary measures                                                                                                                                                         | NA | NA             |
| Main results             | 16  | (a) Give unadjusted estimates and, if applicable, confounder-adjusted estimates and their precision (eg, 95% confidence interval). Make clear which confounders were adjusted for and why they were included | NA | NA             |
|                          |     | (b) Report category boundaries when continuous variables were categorized                                                                                                                                    | NA | NA             |
|                          |     | (c) If relevant, consider translating estimates of relative risk into absolute risk for a meaningful time period                                                                                             | NA | NA             |
| Other analyses           | 17  | Report other analyses done—eg analyses of subgroups and interactions, and sensitivity analyses                                                                                                               | OK | 17 to 20 of 45 |
| <b>Discussion</b>        |     |                                                                                                                                                                                                              |    |                |
| Key results              | 18  | Summarise key results with reference to study objectives                                                                                                                                                     | OK | 8 of 45        |
| Limitations              | 19  | Discuss limitations of the study, taking into account sources of potential bias or imprecision. Discuss both direction and magnitude of any potential bias                                                   | OK | 10 of 45       |
| Interpretation           | 20  | Give a cautious overall interpretation of results considering objectives, limitations, multiplicity of analyses, results from similar studies, and other relevant evidence                                   | OK | 9&10 of 45     |
| Generalisability         | 21  | Discuss the generalisability (external validity) of the study results                                                                                                                                        | OK | 10 of 45       |
| <b>Other information</b> |     |                                                                                                                                                                                                              |    |                |
| Funding                  | 22  | Give the source of funding and the role of the funders for the present study and, if applicable, for the original study on which the present article is based                                                | OK | 12 of 45       |

\*Give information separately for exposed and unexposed groups.

**Note:** An Explanation and Elaboration article discusses each checklist item and gives methodological background and published examples of transparent reporting. The STROBE checklist is best used in conjunction with this article (freely available on the Web sites of PLoS Medicine at <http://www.plosmedicine.org/>, Annals of Internal Medicine at <http://www.annals.org/>, and Epidemiology at <http://www.epidem.com/>). Information on the STROBE Initiative is available at [www.strobe-statement.org](http://www.strobe-statement.org).
