# Supplementary material for: The French reporting system for drug shortages: description and trends from 2012 to 2018: an observational retrospective study
Source: PubMed Central journal article supplement — BMJ Open. 2020 Mar 4;10(3):e034033. doi: 10.1136/bmjopen-2019-034033 (PMC7059530; doi:10.1136/bmjopen-2019-034033), 2020-03-04
Supplement: bmjopen-2019-034033supp001.pdf [file bmjopen-2019-034033supp001.pdf]

**Order of 27 July 2016 fixing the list of therapeutic classes containing major therapeutic of interest drug mentioned in Article L. 5121-31 of the Public Health Code**

**A. – ALIMENTARY TRACT AND METABOLISM**

A02 - DRUGS FOR ACID RELATED DISORDERS  
A02B - DRUGS FOR PEPTIC ULCER AND GASTRO-OESOPHAGEAL REFLUX DISEASE (GORD)  
A03 - DRUGS FOR FUNCTIONAL GASTROINTESTINAL DISORDERS  
A03B - BELLADONNA AND DERIVATIVES, PLAIN  
A04 - ANTIEMETICS AND ANTINAUSEANTS  
A04A - ANTIEMETICS AND ANTINAUSEANTS  
A05 - BILE AND LIVER THERAPY  
A05A - BILE THERAPY  
A05B - LIVER THERAPY, LIPOTROPICS  
A06 - DRUGS FOR CONSTIPATION  
A06A - DRUGS FOR CONSTIPATION  
A07 - ANTIDIARRHEALS, INTESTINAL ANTIINFLAMMATORY/ ANTIINFECTIVE AGENTS  
A07A - INTESTINAL ANTIINFECTIVES  
A07E - INTESTINAL ANTIINFLAMMATORY AGENTS  
A10 - DRUGS USED IN DIABETES  
A10A - INSULINS AND ANALOGUES  
A10B - BLOOD GLUCOSE LOWERING DRUGS, EXCL. INSULINS  
A11 - VITAMINS  
A11C - VITAMIN A AND D, INCL. COMBINATIONS OF THE TWO  
A11D - VITAMIN B1, PLAIN AND IN COMBINATION WITH VITAMIN B6 AND B12  
A11H - OTHER PLAIN VITAMIN PREPARATIONS  
A11J - OTHER VITAMIN PRODUCTS, COMBINATIONS  
A12 - MINERAL SUPPLEMENTS  
A12A - CALCIUM  
A12B - POTASSIUM  
A12C - OTHER MINERAL SUPPLEMENTS  
A16 - OTHER ALIMENTARY TRACT AND METABOLISM PRODUCTS  
A16A - OTHER ALIMENTARY TRACT AND METABOLISM PRODUCTS

**B. – BLOOD AND BLOOD FORMING ORGANS**

B01 - ANTITHROMBOTIC AGENTS  
B01A - ANTITHROMBOTIC AGENTS  
B02 - ANTIHEMORRHAGICS  
B02A - ANTIFIBRINOLYTICS  
B02B - VITAMIN K AND OTHER HEMOSTATICS  
B03 - ANTIANEMIC PREPARATIONS  
B03A - IRON PREPARATIONS  
B03B - VITAMIN B12 AND FOLIC ACID  
B03X - OTHER ANTIANEMIC PREPARATIONS  
B05 - BLOOD SUBSTITUTES AND PERFUSION SOLUTIONS  
B05A - BLOOD AND RELATED PRODUCTS

B05B - I.V. SOLUTIONS  
B05D - PERITONEAL DIALYTICS  
B05X - I.V. SOLUTION ADDITIVES  
B05Z - HEMODIALYTICS AND HEMOFILTRATES  
B06 - OTHER HEMATOLOGICAL AGENTS  
B06A - OTHER HEMATOLOGICAL AGENTS

### C. – CARDIOVASCULAR SYSTEM

C01 - CARDIAC THERAPY  
C01A - CARDIAC GLYCOSIDES  
C01B - ANTIARRHYTHMICS, CLASS I AND III  
C01C - CARDIAC STIMULANTS EXCL. CARDIAC GLYCOSIDES  
C01D - VASODILATORS USED IN CARDIAC DISEASES  
C01E - OTHER CARDIAC PREPARATIONS  
C02 - ANTIHYPERTENSIVES  
C02A - ANTIADRENERGIC AGENTS, CENTRALLY ACTING  
C02B - ANTIADRENERGIC AGENTS, GANGLION-BLOCKING  
C02C - ANTIADRENERGIC AGENTS, PERIPHERALLY ACTING  
C02D - ARTERIOLAR SMOOTH MUSCLE, AGENTS ACTING ON  
C02K - OTHER ANTIHYPERTENSIVES  
C02L - ANTIHYPERTENSIVES AND DIURETICS IN COMBINATION  
C02N - COMBINATIONS OF ANTIHYPERTENSIVES IN ATC-GR. C02  
C03 - DIURETICS  
C03A - LOW-CEILING DIURETICS, THIAZIDES  
C03B - LOW-CEILING DIURETICS, EXCL. THIAZIDES  
C03C - HIGH-CEILING DIURETICS  
C03D - POTASSIUM-SPARING AGENTS  
C03E - DIURETICS AND POTASSIUM-SPARING AGENTS IN COMBINATION  
C03X - OTHER DIURETICS  
C07 - BETA BLOCKING AGENTS  
C07A - BETA BLOCKING AGENTS  
C07B - BETA BLOCKING AGENTS AND THIAZIDES  
C07C - BETA BLOCKING AGENTS AND OTHER DIURETICS  
C07D - BETA BLOCKING AGENTS, THIAZIDES AND OTHER DIURETICS  
C07E - BETA BLOCKING AGENTS AND VASODILATORS  
C07F - BETA BLOCKING AGENTS AND OTHER ANTIHYPERTENSIVES  
C08 - CALCIUM CHANNEL BLOCKERS  
C08C - SELECTIVE CALCIUM CHANNEL BLOCKERS WITH MAINLY VASCULAR EFFECTS  
C08D - SELECTIVE CALCIUM CHANNEL BLOCKERS WITH DIRECT CARDIAC EFFECTS  
C08E - NON-SELECTIVE CALCIUM CHANNEL BLOCKERS  
  
C08G - CALCIUM CHANNEL BLOCKERS AND DIURETICS  
C09 - AGENTS ACTING ON THE RENIN-ANGIOTENSIN SYSTEM  
C09A - ACE INHIBITORS, PLAIN  
C09B - ACE INHIBITORS, COMBINATIONS  
C09C - ANGIOTENSIN II ANTAGONISTS, PLAIN

C09D - ANGIOTENSIN II ANTAGONISTS, COMBINATIONS  
C09X - OTHER AGENTS ACTING ON THE RENIN-ANGIOTENSIN SYSTEM  
C010 - LIPID MODIFYING AGENTS  
C10A - LIPID MODIFYING AGENTS, PLAIN

#### **D. – DERMATOLOGICALS**

D01 - ANTIFUNGALS FOR DERMATOLOGICAL USE  
D01A - ANTIFUNGALS FOR TOPICAL USE  
D01B - ANTIFUNGALS FOR SYSTEMIC USE  
D03 - PREPARATIONS FOR TREATMENT OF WOUNDS AND ULCERS  
D03B - ENZYMES  
D05 - ANTIPSORIATICS  
D05A - ANTIPSORIATICS FOR TOPICAL USE  
D05B - ANTIPSORIATICS FOR SYSTEMIC USE  
D06 - ANTIBIOTICS AND CHEMOTHERAPEUTICS FOR DERMATOLOGICAL USE  
D07 - CORTICOSTEROIDS, DERMATOLOGICAL PREPARATIONS  
D07A - CORTICOSTEROIDS, PLAIN  
D08 - ANTISEPTICS AND DISINFECTANTS  
D08A - ANTISEPTICS AND DISINFECTANTS  
D11 - OTHER DERMATOLOGICAL PREPARATIONS  
D11A - OTHER DERMATOLOGICAL PREPARATIONS

#### **G. – GENITO URINARY SYSTEM AND SEX HORMONES**

G01 - GYNECOLOGICAL ANTIINFECTIVES AND ANTISEPTICS  
G02 - OTHER GYNECOLOGICALS  
G02A - OXYTOCICS  
G02B - CONTRACEPTIVES FOR TOPICAL USE  
G02C - OTHER GYNECOLOGICALS  
G03 - SEX HORMONES AND MODULATORS OF THE GENITAL SYSTEM  
G03A - HORMONAL CONTRACEPTIVES FOR SYSTEMIC USE  
G03B - ANDROGENS  
G03C - ESTROGENS  
G03D - PROGESTOGENS  
G03G - GONADOTROPINS AND OTHER OVULATION STIMULANTS  
G03H - ANTIANDROGENS  
G03X - OTHER SEX HORMONES AND MODULATORS OF THE GENITAL SYSTEM

#### **H. – SYSTEMIC HORMONAL PREPARATIONS, EXCL. SEX HORMONES AND INSULINS**

H01 - PITUITARY AND HYPOTHALAMIC HORMONES AND ANALOGUES  
H01A - ANTERIOR PITUITARY LOBE HORMONES AND ANALOGUES  
H01B - POSTERIOR PITUITARY LOBE HORMONES  
H01C - HYPOTHALAMIC HORMONES  
H02 - CORTICOSTEROIDS FOR SYSTEMIC USE  
H02A - CORTICOSTEROIDS FOR SYSTEMIC USE, PLAIN  
H02C - ANTIADRENAL PREPARATIONS

H03 - THYROID THERAPY  
H03A - THYROID PREPARATIONS  
H03B - ANTITHYROID PREPARATIONS  
H03C - IODINE THERAPY  
H04 - PANCREATIC HORMONES  
H04A - GLYCOGENOLYTIC HORMONES  
H05 - CALCIUM HOMEOSTASIS  
H05A - PARATHYROID HORMONES AND ANALOGUES  
H05B - ANTI-PARATHYROID AGENTS

#### **J. – ANTIINFECTIVES FOR SYSTEMIC USE**

J01 - ANTIBACTERIALS FOR SYSTEMIC USE  
J01A - TETRACYCLINES  
J01B - AMPHENICOLS  
J01C - BETA-LACTAM ANTIBACTERIALS, PENICILLINS  
J01D - OTHER BETA-LACTAM ANTIBACTERIALS  
J01E - SULFONAMIDES AND TRIMETHOPRIM  
J01F - MACROLIDES, LINCOSAMIDES AND STREPTOGRAMINS  
J01G - AMINOGLYCOSIDE ANTIBACTERIALS  
J01M - QUINOLONE ANTIBACTERIALS  
J01R - COMBINATIONS OF ANTIBACTERIALS  
J01X - OTHER ANTIBACTERIALS  
J02 - ANTIMYCOTICS FOR SYSTEMIC USE  
J02A - ANTIMYCOTICS FOR SYSTEMIC USE  
J04 - ANTIMYCOBACTERIALS  
J04A - DRUGS FOR TREATMENT OF TUBERCULOSIS  
J04B - DRUGS FOR TREATMENT OF LEPROSY  
J05 - ANTIVIRALS FOR SYSTEMIC USE  
J05A - DIRECT ACTING ANTIVIRALS  
J06 - IMMUNE SERA AND IMMUNOGLOBULINS  
J06A - IMMUNE SERA  
J06B - IMMUNOGLOBULINS  
J07 - VACCINES  
J07A - BACTERIAL VACCINES  
J07B - VIRAL VACCINES  
J07C - BACTERIAL AND VIRAL VACCINES, COMBINED

#### **L. – ANTINEOPLASTIC AND IMMUNOMODULATING AGENTS**

L01 - ANTINEOPLASTIC AGENTS  
L01A - ALKYLATING AGENTS  
L01B - ANTIMETABOLITES  
L01C - PLANT ALKALOIDS AND OTHER NATURAL PRODUCTS  
L01D - CYTOTOXIC ANTIBIOTICS AND RELATED SUBSTANCES  
L01X - OTHER ANTINEOPLASTIC AGENTS  
L02 - ENDOCRINE THERAPY  
L02A - HORMONES AND RELATED AGENTS

L02B - HORMONE ANTAGONISTS AND RELATED AGENTS  
L03 - IMMUNOSTIMULANTS  
L03A - IMMUNOSTIMULANTS  
L04 - IMMUNOSUPPRESSANTS  
L04A - IMMUNOSUPPRESSANTS

#### **M. – MUSCULO-SKELETAL SYSTEM**

M03 - MUSCLE RELAXANTS  
M03A - MUSCLE RELAXANTS, PERIPHERALLY ACTING AGENTS  
M03B - MUSCLE RELAXANTS, CENTRALLY ACTING AGENTS  
M03C - MUSCLE RELAXANTS, DIRECTLY ACTING AGENTS  
M04 - ANTIGOUT PREPARATIONS  
M04A - ANTIGOUT PREPARATIONS  
M05 - DRUGS FOR TREATMENT OF BONE DISEASES  
M05B - DRUGS AFFECTING BONE STRUCTURE AND MINERALIZATION

#### **N. – NERVOUS SYSTEM**

N01 - ANESTHETICS  
N01A - ANESTHETICS, GENERAL  
N01B - ANESTHETICS, LOCAL  
N02 - ANALGESICS  
N02A - OPIOIDS  
N02B - OTHER ANALGESICS AND ANTIPYRETICS  
N03 - ANTIEPILEPTICS  
N03A - ANTIEPILEPTICS  
N04 - ANTI-PARKINSON DRUGS  
N04A - ANTICHOLINERGIC AGENTS  
N04B - DOPAMINERGIC AGENTS  
N05 - PSYCHOLEPTICS  
N05A - ANTIPSYCHOTICS  
N05B - ANXIOLYTICS  
N06 - PSYCHOANALEPTICS  
N06A - ANTIDEPRESSANTS  
N06B - PSYCHOSTIMULANTS, AGENTS USED FOR ADHD AND NOOTROPICS  
N06D - ANTI-DEMENTIA DRUGS  
N07 - OTHER NERVOUS SYSTEM DRUGS  
N07A - PARASYMPATHOMIMETICS  
N07B - DRUGS USED IN ADDICTIVE DISORDERS  
N07X - OTHER NERVOUS SYSTEM DRUGS

#### **P. – ANTIPARASITIC PRODUCTS, INSECTICIDES, AND REPELLENTS**

P01 - ANTIPROTOZOALS  
P01A - AGENTS AGAINST AMOEBIASIS AND OTHER PROTOZOAL DISEASES

P01B - ANTIMALARIALS  
P01C - AGENTS AGAINST LEISHMANIASIS AND TRYPANOSOMIASIS  
P02 - ANTHELMINTICS  
P02B - ANTITREMATODALS  
P02C - ANTINEMATODAL AGENTS  
P02D - ANTICESTODALS  
P03 - ECTOPARASITICIDES, INCL. SCABICIDES, INSECTICIDES AND REPELLENTS  
P03A - ECTOPARASITICIDES, INCL. SCABICIDES

#### **R. – RESPIRATORY SYSTEM**

R03 - DRUGS FOR OBSTRUCTIVE AIRWAY DISEASES  
R03A - ADRENERGICS, INHALANTS  
R03B - OTHER DRUGS FOR OBSTRUCTIVE AIRWAY DISEASES, INHALANTS  
R03C - ADRENERGICS FOR SYSTEMIC USE  
R03D - OTHER SYSTEMIC DRUGS FOR OBSTRUCTIVE AIRWAY DISEASES  
R06 - ANTIHISTAMINES FOR SYSTEMIC USE  
R06A - ANTIHISTAMINES FOR SYSTEMIC USE  
R07 - OTHER RESPIRATORY SYSTEM PRODUCTS  
R07A - OTHER RESPIRATORY SYSTEM PRODUCTS

#### **S. – SENSORY ORGANS**

S01 - OPHTHALMOLOGICALS  
S01A - ANTIINFECTIVES  
S01B - ANTIINFLAMMATORY AGENTS  
S01E - ANTIGLAUCOMA PREPARATIONS AND MIOTICS  
S01F - MYDRIATICS AND CYCLOPLEGICS  
S01H - LOCAL ANESTHETICS  
S01J - DIAGNOSTIC AGENTS  
S01L - DRUGS AGAINST OCULO-VASCULAR DISORDERS  
S01X - OTHER OPHTHALMOLOGICALS  
S02 - OTOLOGICALS  
S02A - ANTIINFECTIVES  
S02B - CORTICOSTEROIDS

#### **V. - VARIOUS**

V01 - ALLERGENS  
V01A - ALLERGENS  
V03 - ALL OTHER THERAPEUTIC PRODUCTS  
V03A - ALL OTHER THERAPEUTIC PRODUCTS  
V04 - DIAGNOSTIC AGENTS  
V04C - OTHER DIAGNOSTIC AGENTS  
V08 - CONTRAST MEDIA  
V08A - X-RAY CONTRAST MEDIA, IODINATED  
V08B - X-RAY CONTRAST MEDIA, NON-IODINATED  
V08C - MAGNETIC RESONANCE IMAGING CONTRAST MEDIA

V08D - ULTRASOUND CONTRAST MEDIA  
V09 - DIAGNOSTIC RADIOPHARMACEUTICALS  
V09A - CENTRAL NERVOUS SYSTEM  
V09B - SKELETON  
V09C - RENAL SYSTEM  
V09D - HEPATIC AND RETICULO ENDOTHELIAL SYSTEM  
V09E - RESPIRATORY SYSTEM  
V09F - THYROID  
V09G - CARDIOVASCULAR SYSTEM  
V09H - INFLAMMATION AND INFECTION DETECTION  
V09I - TUMOUR DETECTION  
V09X - OTHER DIAGNOSTIC RADIOPHARMACEUTICALS  
V10 - THERAPEUTIC RADIOPHARMACEUTICALS  
V10A - ANTIINFLAMMATORY AGENTS  
V10B - PAIN PALLIATION (BONE SEEKING AGENTS)  
V10X - OTHER THERAPEUTIC RADIOPHARMACEUTICALS
